## **Intracellular Calcium links Milk Stasis to Lysosome Dependent Cell Death during Mammary Gland Involution**

### **Cell death during involution**

Jaekwang Jeong<sup>1,8</sup>, Jongwon Lee<sup>2</sup>, Gabriel Talaia<sup>3</sup>, Wonnam Kim<sup>4</sup>, Junho Song<sup>2</sup>, Kwangmin Yoo<sup>2</sup>, David G. Gonzalez<sup>5</sup>, Diana Athonvarangkul<sup>1</sup>, Jaehun Shin<sup>1</sup>, Pamela Dann<sup>1</sup>, Ann M Haberman<sup>6</sup>, Lark Kyun Kim<sup>7</sup>, Shawn M. Ferguson<sup>3</sup>, Jungmin Choi<sup>2</sup>, John Wysolmerski<sup>1,8</sup>

1. Section of Endocrinology and Metabolism, Department of Internal Medicine, Yale University School of Medicine, New Haven, CT, USA
2. Department of Biomedical Sciences, Korea University College of Medicine, Seoul, Republic of Korea
3. Departments of Cell Biology and of Neuroscience, Wu Tsai Institute, Yale University School of Medicine, New Haven, Connecticut 06510, USA
4. Cnh Center for Cancer Research, 462 Bongeunsa-ro, Gangnam-gu, Seoul 06154, Republic of Korea
5. Department of Genetics, Yale School of Medicine, New Haven, CT 06510, USA
6. Departments of Immunobiology and laboratory Medicine, Yale School of Medicine, New Haven, CT 06510, USA
7. Severance Biomedical Science Institute, Graduate School of Medical Science, Brain Korea 21 Project, Gangnam Severance Hospital, Yonsei University College of Medicine, Seoul 06230, Republic of Korea
8. Corresponding author

### **Corresponding Author:**

Jaekwang Jeong, Ph.D.  
Research Scientist  
Section of Endocrinology and Metabolism  
Department of Internal Medicine  
TAC S120  
Yale University School of Medicine  
New Haven, CT 06520  
301-503-9724

John Wysolmerski, MD  
Professor of Medicine  
Section of Endocrinology and Metabolism  
Department of Internal Medicine  
TAC S123a  
Yale University School of Medicine  
New Haven, CT 06520  
[john.wysolmerski@yale.edu](mailto:john.wysolmerski@yale.edu)  
203-785-7447

## Abstract

Involution of the mammary gland after lactation is a dramatic example of coordinated cell death. Weaning results in the distension of the alveolar structures by the accumulation of milk, which, in turn, activates STAT3 and initiates a caspase-independent but lysosome-dependent cell death (LDCD) pathway. Although the importance of STAT3 and LDCD in early mammary involution is well established, it has not been entirely clear how milk stasis activates STAT3. In this report, we demonstrate that protein levels of the PMCA2 calcium pump are significantly downregulated within 2-4 hours of experimental milk stasis. Reductions in PMCA2 expression correlate with an increase in cytoplasmic calcium *in vivo* as measured by multiphoton intravital imaging of GcAMP6f fluorescence. These events occur concomitant with the appearance of nuclear pSTAT3 expression but prior to significant activation of LDCD or its previously implicated mediators such as LIF, IL6 and TGF $\beta$ 3, all of which appear to be upregulated by increased intracellular calcium. We also observed that milk stasis, loss of PMCA2 expression and increased intracellular calcium levels activate TFEB, an important regulator of lysosome biogenesis. This is the result of increased TGF $\beta$  signaling and inhibition of cell cycle progression. Finally, we demonstrate that increased intracellular calcium activates STAT3 by inducing degradation of its negative regulator, SOCS3, which also appears to be mediated by TGF $\beta$  signaling. In summary, these data suggest that intracellular calcium serves as an important biochemical signal linking milk stasis to STAT3 activation, increased lysosomal biogenesis, and lysosome-mediated cell death.

## Teaser

Increase intracellular calcium leads to STAT3 activation, increased lysosomal biogenesis, and lysosome-mediated cell death.

## Introduction

Involution of the mammary gland following lactation is one of the most dramatic examples of coordinated cell death in nature<sup>1-4</sup>. This process is initiated by the failure to empty milk from the gland for more than 12-24 hours, which results in the distension of the alveolar structures, a change in the shape of mammary epithelial cells (MECs) and programmed cell death of a subset of epithelial cells. This first phase of involution is regulated by local mechanisms and is reversible. If the gland remains un-suckled for more than 48-72 hours, a second phase of irreversible involution ensues, characterized by widespread cell death, proteolytic disruption of the basement membranes, and remodeling of epithelial and stromal components of the gland to approximate its pre-pregnant structure<sup>1-4</sup>.

Although several pathways have been implicated in triggering the initial phase of involution<sup>1,4-12</sup>, a principal mediator of this process appears to be the activation of signal transducer and activator 3 (STAT3), which has been thought to occur due to the secretion of cytokines, such as leukemia inhibitory factor (LIF), interleukin-6 (IL6) and transforming growth factor (TGF)  $\beta$ 3 by MECs in response to milk stasis<sup>8-10,13,14</sup>. More recent work has shown that STAT3, in turn, increases the number and size of lysosomes in MECs as well as the expression of lysosomal enzymes such as cathepsin B and L<sup>8,15,16</sup>. Together, these events result in a caspase-independent form of lysosome-dependent cell death (LDCD)<sup>8,16</sup>. Interestingly, a similar process of LDCD occurs in neurons in response to ischemia-reperfusion injury, where it is triggered, in part, by cellular calcium ( $\text{Ca}^{2+}$ ) overload<sup>17,18</sup>.

MECs transport large amounts of  $\text{Ca}^{2+}$  from the systemic circulation into milk, a process that involves the plasma membrane calcium-ATPase 2 (PMCA2)<sup>19</sup>. PMCA2 is expressed in the apical plasma membrane of MECs specifically during lactation<sup>19,20</sup> and it transports  $\text{Ca}^{2+}$  out of cells in response to ATP hydrolysis<sup>21-23</sup>. In its absence, milk  $\text{Ca}^{2+}$  transport is reduced by 60-70%<sup>19,20</sup>. PMCA2 levels decline rapidly after weaning and PMCA2-null mice demonstrate inappropriate, widespread MEC death during lactation<sup>20</sup>. Given that PMCA2 is important for  $\text{Ca}^{2+}$  secretion from MECs, we hypothesized that the decline in PMCA2 levels upon weaning triggers LDCD by increasing intracellular  $\text{Ca}^{2+}$  levels. We now report that decreased PMCA2 expression is associated with increased cytoplasmic  $\text{Ca}^{2+}$  levels in MECs *in vivo*, and that increased intracellular  $\text{Ca}^{2+}$  triggers LIF, IL-6 and TGF $\beta$ 3 expression, as well as STAT3 phosphorylation. Furthermore, we demonstrate that elevated intracellular  $\text{Ca}^{2+}$  levels activate transcriptional programs leading to lysosome biogenesis. These results suggest that an increase in intracellular  $\text{Ca}^{2+}$  due to reduced PMCA2-mediated calcium clearance represents an important proximal event coupling milk stasis to LDCD.

## Results

### Milk Stasis Increases Intracellular Calcium Levels.

We hypothesized that a decrease in PMCA2 expression after weaning might increase intracellular  $\text{Ca}^{2+}$  levels and, as a result, contribute to lysosome-dependent cell death (LDCD). Experimentally, involution can be initiated in a single mouse mammary gland by sealing the teat with adhesive<sup>24</sup>. Given that the other 9 glands are suckled normally and continue to make milk, this model isolates the consequences of milk stasis from systemic changes caused by weaning. As shown in Fig. 1A, we confirmed that, compared to the contralateral suckled gland (control), PMCA2 immunofluorescence was significantly reduced by 4 hours after teat sealing and was decreased to very low levels by 24 hours<sup>20</sup>. This was associated with an increase in nuclear staining for pSTAT3, which was initially detectable at 4 hours after teat sealing and progressively increased at 8 and 24 hours (Fig. 1A&B).

In order to test whether milk stasis increased cytoplasmic  $\text{Ca}^{2+}$  levels *in vivo*, we generated transgenic mice expressing the genetically encoded, GCaMP6f calcium sensor specifically in MECs. GCaMP6f is a modified EGFP, which fluoresces with progressive intensity in response to increasing concentrations of cytoplasmic  $\text{Ca}^{2+}$ <sup>25,26</sup>. We crossed Ai95(RCL-GCaMP6f)-D (Ai95) mice to beta-lactoglobulin (BLG-Cre mice to activate expression of GCaMP6f in MECs at the transition from pregnancy to lactation<sup>27</sup>. Lactating BLG-Cre;Ai95 females underwent intravital imaging of mammary epithelial cells using multiphoton laser scanning microscopy of anesthetized mice at 4, 8 and 24 hours post teat-sealing of a 4<sup>th</sup> inguinal mammary gland; the contralateral gland, which was not sealed, served as a control. We could not image individual mice sequentially for

a full 24 hours. Therefore, mice were either studied at 4 and 8 hours, or at 24 hours after teat sealing. We used the second harmonic-generated signal from the collagen fibers within the fascia covering the glands as an anchoring point to ensure that we compared images at comparable tissue depths. As shown in Fig. 1C&D, and in Supplemental Video.1, teat-sealing caused a significant increase in intracellular  $\text{Ca}^{2+}$  levels *in vivo*, as evidenced by an increase in GCaMP fluorescence which was first detectable at 8 hours and which persisted, increased and became more uniform at 24 hours. There was no similar increase of fluorescence 24 hours after teat sealing in the glands of Ai95 females in the absence of Cre recombinase (Fig. 1C&D). These data demonstrate that milk stasis is associated with an increase in cytoplasmic  $\text{Ca}^{2+}$  levels.

The regulation of early involution is complex but factors implicated as important triggers of LDCD include leukemia inhibitory factor (LIF), interleukin 6 (IL6) and transforming growth factor-beta 3 ( $\text{TGF}\beta 3$ ), all of which are produced by MECs in response to milk stasis and can contribute to STAT3 activation<sup>8-10,13,14</sup>. In turn, STAT3 signaling has been shown to be required for LDCD in MECs after weaning<sup>8,28,29</sup>. In order to assess how temporal changes in PMCA2 expression and cytoplasmic  $\text{Ca}^{2+}$  concentration correlate with the onset of LDCD, we compared them to changes in LAMP2, cathepsin B, LIF, IL6 and  $\text{TGF}\beta 3$  expression at 2,4,8 and 24 hours post teat sealing. The contralateral gland which continued to be suckled normally served as a control in all experiments. During lactation, staining intensity for LAMP2 and cathepsin B was low but both progressively increased after teat sealing, beginning with the 4-hour time point. Immunofluorescence demonstrated an increase in the size of defined lysosomes that co-stained for both LAMP2 and Cathepsin B but also an increase in

more diffuse cytoplasmic staining for both markers (Fig. 1E). At 24 hours, we observed the appearance of intensely staining foci of Cathepsin B that did not co-localize with LAMP2 staining. These changes were mirrored by increasing levels of Cathepsin B as assessed by immunoblotting whereas PMCA2 levels declined during this same time course (Fig. 1F). Interestingly, we did not see any change in LIF mRNA expression until 8 hours and this increase was minor compared to the prominent increase in LIF mRNA at 24 hours post teat sealing (Fig. 1G). A similar pattern was seen for TGF $\beta$ 3 and IL6 mRNA expression, and we actually noted a decrease in TGF $\beta$ 3 mRNA expression at 2 and 4 hours post teat sealing, before observing an increase in its expression over baseline at 8 and 24 hours. The relative increases in IL6 and TGF $\beta$ 3 mRNA levels were quantitatively much less than the increase in LIF mRNA. We also examined the expression of two STAT3-target genes that have been noted to participate in the inflammatory responses to involution, LBP (lipopolysaccharide binding protein) and CD14 (Lipopolysaccharide receptor)<sup>7,12</sup>. Both mRNAs were only significantly elevated after 24-hours of teat sealing. These changes all occurred either after or concurrent with the decrease in PMCA2 expression or the increase in intracellular Ca<sup>2+</sup> levels but not before. Therefore, decreased PMCA2 expression is an early response to milk stasis, occurring before significant increases in cytoplasmic Ca<sup>2+</sup> concentrations, widespread STAT3 activation or upregulation of LDCD markers. Interestingly, these data also demonstrate that decreased PMCA2 and increased pSTAT3 occur prior to significant increases in LIF, IL6 or TGF $\beta$ 3 mRNA expression.



## **Changes in PMCA2 and pSTAT3 expression are reversible with reintroduction of suckling.**

The first phase of mammary gland involution is reversible if pups are reintroduced to suckle within 48-hours of milk stasis<sup>1,3,4,7</sup>. We next examined whether the reversal of early involution would be associated with changes in PMCA2 expression and/or intracellular calcium. As illustrated in Fig. 2A, we compared mammary glands from 3 groups of lactating mice: A) mice who were sacrificed on day 10 of lactation without manipulation; B) mice whose pups were removed for 24 hours before the mothers were sacrificed; and C) mice whose pups were removed for 24 hours and then replaced to re-suckle for 24 hours before the mothers were sacrificed. As expected from the previous teat-sealing experiments, PMCA2 mRNA and protein levels were significantly reduced at 24 hours after pup withdrawal (Fig. 2B-D). Remarkably, 24 hours after pups were re-introduced, PMCA2 mRNA levels had recovered almost to baseline lactating levels (Fig. 2B). In addition, PMCA2 protein levels and apical membrane PMCA2 staining intensity were both increased back towards the levels noted during lactation (Fig. 2C&D). These changes in PMCA2 expression were associated with reciprocal changes in cytoplasmic Ca<sup>2+</sup> as assessed by GCaMP6f fluorescence (Fig. 2E). Intracellular Ca<sup>2+</sup> levels increased with weaning but were reduced back to baseline after suckling was reestablished. Like teat sealing, pup withdrawal also led to an increase in LIF, TGFβ3 and IL6 mRNA expression, but re-suckling restored the expression of all 3 genes back to lactating levels (Fig. 2F). Likewise, nuclear pSTAT3 staining as well as CD14 and LBP mRNA levels were increased by pup withdrawal but were suppressed back to baseline after reintroduction of the pups (Fig. 2F&G).

Interestingly, nuclear staining for pSTAT5 persisted for 24-hours of pup withdrawal, at which time MECs expressed both pSTAT5 and pSTAT3 in their nuclei.

We also performed immunofluorescence staining and immunoblotting to assess cathepsin B expression. As seen in Figs. 2H&I, cathepsin B levels were increased at 24-hours of pup withdrawal and, like pSTAT3 staining, Cathepsin B fluorescence and protein levels were reduced back towards baseline 24 hours after reintroduction of the pups. In contrast, LAMP2 immunofluorescence intensity was increased by pup withdrawal but remained elevated 24-hours after pups were reintroduced (Fig. 2H). These data demonstrate strong correlations between PMCA2 expression, intracellular  $Ca^{2+}$  levels, activation of STAT3 and induction of LDCD markers.

### **Loss of PMCA2 prematurely activates LDCD during lactation.**

We next examined mediators of LDCD in PMCA2-null mice in order to determine whether loss of PMCA2 was sufficient to activate this pathway. As noted previously, loss of PMCA2 expression caused premature activation of STAT3<sup>20</sup> as evidenced by pSTAT3 expression in the nuclei of MECs at mid-lactation and an increase in pSTAT3 levels on immunoblots of whole mammary glands (Fig. 3A&B). Mammary glands from lactating PMCA2-null mice also demonstrated an increase in LAMP2 and Cathepsin B immunofluorescence as well as an increase in cathepsin B levels (Fig. 3C&D). Significantly, loss of PMCA2 caused an increase in LIF, TGF $\beta$ 3 and IL6 mRNA levels during mid-lactation, even though continued suckling by pups removed milk, preventing milk stasis and alveolar distension (Fig. 3E). As in the teat-sealed and weaned glands (Figs. 1&2) expression of the STAT3 targets, CD14 and LBP was also upregulated

inappropriately during lactation (Fig. 3E). These data demonstrate that loss of PMCA2 is sufficient to prematurely induce cytokine expression, STAT3 activation and LDCD in MECs during lactation, suggesting that the early decline in PMCA2 levels normally observed in response to milk stasis, serves as an important trigger for LDCD during normal involution.

### **Intracellular Calcium activates STAT3 by degrading SOCS3 in a TGF $\beta$ -dependent pathway.**

In order to test whether loss of PMCA2 triggers LDCD by raising intracellular Ca<sup>2+</sup>, we treated MCF10A cells, an immortalized but non-transformed human mammary epithelial cell line, with ionomycin and increased extracellular Ca<sup>2+</sup> in order to raise cytoplasmic Ca<sup>2+</sup> levels<sup>30</sup>. We examined changes in cytoplasmic Ca<sup>2+</sup> by measuring the increase in fluorescence in MCF10A cells transiently transfected with a Ca<sup>2+</sup> indicator, RCaMP<sup>31</sup>. As expected, treating MCF10A cells with 1 $\mu$ M ionomycin and 10mM extracellular Ca<sup>2+</sup> for 16 hours increased RCaMP fluorescence (Supplemental Fig 1A). It also increased nuclear pSTAT3 expression (Supplemental Fig 1B&C) as well as immunofluorescence for cathepsin B and LAMP2 (Supplemental Fig 1D). We also observed an induction of LIF, IL6 and TGF $\beta$ 3 mRNA expression as well as the STAT3 target genes, CD14 and LBP (Supplemental Fig. 1E). These data demonstrate that, in MCF10A cells *in vitro*, increased levels of intracellular Ca<sup>2+</sup> are sufficient to trigger key aspects of the STAT3-LDCD pathway.

In MECs, STAT3 stimulates *Suppressor of Cytokine Signaling 3* (SOCS3) gene expression and, in turn, SOCS3 inhibits STAT3 phosphorylation<sup>32-34</sup>, defining a short

negative feedback loop. Moreover, similar to the findings in PMCA2-null mammary glands (Fig. 3), deletion of SOCS3 from MECs causes inappropriate activation of STAT3 during lactation<sup>34</sup>. Therefore, we next examined SOCS3 levels in response to teat sealing and in PMCA2-null mammary glands. As shown in Fig. 4A, as compared to the contralateral lactating gland (time 0), SOCS3 protein levels were diminished within 2-4 hours after teat sealing and became substantially reduced by 8 and 24 hours. Interestingly, this occurred despite a marked increase in *Socs3* mRNA levels at 8 and 24-hours after teat sealing (Fig. 4B). SOCS3 levels were also significantly reduced in lactating PMCA2-null glands as compared to wild-type lactating glands, although not to the same extent as in wild-type glands at 24-hours after involution (Fig. 4A&C). As with teat-sealing, the pattern was the opposite for *Socs3* mRNA levels; despite the decrease in SOCS3 protein levels, there was a significant increase in *Socs3* mRNA levels in lactating PMCA2-null mammary glands as compared to wild-type control lactating glands (Fig. 4D). Similarly, reintroduction of suckling after 24-hours of weaning led to reciprocal changes in SOCS3 protein and mRNA levels. Re-suckling increased SOCS3 protein (Fig. 4E) and reduced *Socs3* mRNA levels (Fig. 4F).

Given that *Socs3* gene expression is induced by STAT3, increased *Socs3* mRNA levels likely reflect that SOCS3 protein is degraded in response to loss of PMCA2 expression, which we hypothesized was caused by increased intracellular  $Ca^{2+}$ <sup>35-37</sup>. To test this possibility, we examined the effects of increasing intracellular  $Ca^{2+}$  on SOCS3 protein and mRNA expression in MCF10A cells. As shown in Fig. 4G, treatment of these cells with ionomycin and increasing doses of extracellular  $Ca^{2+}$  resulted in a dose-dependent decrease in SOCS3 protein levels as assessed by immunoblot. Increasing

intracellular  $\text{Ca}^{2+}$  levels also caused a reciprocal increase in Socs3 mRNA levels (Fig. 4H). Together, these data suggest that the loss of PMCA2 and the resulting increased levels of intracellular  $\text{Ca}^{2+}$  due to milk stasis, lead to SOCS degradation, which, in turn, increases pSTAT3 levels.

TGF $\beta$  and Jak-Stat signaling pathways interact in many settings<sup>38,39</sup>, and since TGF $\beta$ 3 expression was induced in response to teat-sealing (Fig. 1G), loss of PMCA2 expression (Fig. 3E) and increased intracellular  $\text{Ca}^{2+}$  levels in MCF10A cells (Supplemental Fig. 1E), we next asked whether TGF $\beta$  signaling contributed to the reductions in SOCS3 levels noted in MCF10A cells. As shown in Supplemental Fig. 2A, and has been reported previously, at 24-hours after teat sealing, the expression of both TGF $\beta$ 1 and TGF $\beta$ 3 is increased in the mammary gland, although TGF $\beta$ 3 expression predominates, and TGF $\beta$ 2 levels remain unchanged<sup>1,10</sup>. We next treated MCF10A cells with each of the three isoforms of TGF $\beta$  and measured SOCS3 protein levels and SOCS3 mRNA levels. As shown in Fig. 4I&J, as well as Supplemental Fig. 2B&C, TGF $\beta$ 3 and TGF $\beta$ 1 reduced SOCS3 protein levels but increased SOCS3 mRNA levels. TGF $\beta$ 2 had no effect on either SOCS3 protein or mRNA levels. Of note, the effects of either TGF $\beta$ 3 or TGF $\beta$ 1 could be blunted using an antibody that is described to inhibit all TGF-beta isoforms<sup>40,41</sup>. Furthermore, treatment of MCF10A cells with the same TGF $\beta$ -blocking antibody was able to blunt the ability of 10mM calcium plus ionomycin to reduce SOCS3 protein levels (Fig. 4K) and to induce SOCS3 mRNA expression (Fig. 4L). Finally, simultaneous treatment of cells with TGF $\beta$ 3 or TGF $\beta$ 1 and a STAT3 inhibitor, galiellaclatone, abrogated the rise in SOCS3 mRNA levels supporting the idea that the increase in SOCS3 mRNA expression in response to TGF $\beta$  was due to the dis-

inhibition of STAT3 signaling secondary to the decline in SOCS3 protein (Fig. 4M, Supplemental Fig 2D).

In order to validate these findings more comprehensively, we treated MCF10A cells with either high calcium or with TGF $\beta$ 3 as described above and performed bulk RNA sequencing. As shown in Fig. 4N, treatment of MCF10A cells with either calcium and ionomycin or with TGF $\beta$ 3 significantly altered the expression of genes in the canonical JAK/STAT signaling pathway, in the canonical STAT3 pathway and in the canonical IL6 signaling pathway as determined by Ingenuity Pathway Analysis. Furthermore, gene set enrichment analysis (GSEA) also demonstrated upregulation of genes within the hallmark IL6-JAK-STAT3 signaling pathway. Together, these data combined with those presented in the prior paragraphs, suggest that the effects of intracellular Ca<sup>2+</sup> levels on SOCS3 expression and STAT3 activation may be mediated, in part, by the induction of TGF $\beta$ 3 secretion.

### **Increased intracellular calcium levels activate TFEB signaling to increase lysosomal biogenesis.**

The initiation of LDCD involves an increase in lysosome mass as well as an increase in lysosome membrane permeability<sup>8,16</sup>. Consistent with this observation, we found expression of the lysosomal marker, LAMP2, to be increased in response to teat sealing, pup withdrawal and in lactating PMCA2-null glands (Figs 1-3 & Fig. 5A). An important regulator of lysosome biogenesis is the transcription factor EB (TFEB)<sup>42,43</sup> and immunostaining for TFEB revealed increased total and nuclear staining in both the teat-sealed mammary gland and in lactating PMCA2-null glands (Fig. 5B). TFEB mRNA

levels were also increased in response to teat sealing and in PMCA2-null glands during lactation (Fig. 5C). Likewise, withdrawal of pups for 24 hours increased TFEB mRNA levels, but reintroduction of pups after 24 hours of weaning, led to a reduction of TFEB mRNA levels back to below baseline levels, correlating with changes in PMCA2 expression and intracellular  $\text{Ca}^{2+}$  levels as noted previously (Fig. 5D, Fig.2). We also detected changes in gene expression consistent with activation of TFEB when we interrogated a RNAseq database which included mouse mammary glands harvested at day 10 of lactation and at day 2 of involution<sup>44</sup>. KEGG-identified gene set enrichment analysis demonstrated an increase in the expression of genes associated with lysosomes and autophagy at day 2 of involution as compared to lactation, both of which are regulated by TFEB (Fig. 5E). Furthermore, as shown in the volcano plot and associated heat maps, involution was associated with an increase in the expression of genes previously identified as specifically regulated by TFEB, including multiple lysosomal proteins, including cathepsin B and Lamp families (Fig. 5F&G).

These results *in vivo* were reinforced by results in mammary epithelial cells *in vitro*. As shown in Fig. 5H, incubating MCF10A cells with 1 $\mu\text{M}$  ionomycin and 10mM extracellular  $\text{Ca}^{2+}$  for 16 hours led to a dramatic increase in immunofluorescence for TFEB, both in the cytoplasm and in the nuclei. This was associated with an increase in TFEB mRNA levels (Fig. 5I). In addition, analysis of RNAseq data from MCF10A cells treated with high calcium demonstrated activation of genes known to be regulated by TFEB and KEGG-identified gene set enrichment analysis demonstrated a significant increase in the expression of genes associated with lysosomes (Fig. 5J-L). Given the results regarding SOCS3 levels, we also asked whether TFEB levels could be regulated

by TGF $\beta$ s in MCF10A cells. TGF $\beta$ 1 and 3 reproduced the effects of high calcium by increasing total and nuclear immunofluorescence for TFEB (Fig. 5M, Supplemental Fig. 2E) as well as increasing overall TFEB protein by Western analysis (Fig. 5N, Supplemental Fig. 2F) and TFEB mRNA levels were increased as well (Fig. 5O, Supplemental Fig. 2G). In each case, the induction of TFEB expression was mitigated by treatment with a pan-TGF $\beta$  blocking antibody (Fig. 5M-O). This antibody was also effective in blocking the induction of TFEB protein and mRNA levels by high calcium, suggesting that TGF $\beta$ 3 mediates the effects of calcium in MCF10A cells (Fig. H&I). As with high calcium, analysis of RNAseq data from MCF10A cells treated with TGF $\beta$ 3 demonstrated activation of a series of genes known to be regulated by TFEB (Fig. 5 P&Q). Together, these data suggest that elevations in intracellular calcium activate TFEB signaling and lysosomal biogenesis, in part, by increasing TGF $\beta$ 3 production.

**Activation of TFEB signaling by elevations in intracellular calcium or TGF $\beta$ 3 is associated with inhibition of cell cycle progression.**

Nuclear translocation of TFEB is controlled by multiple mechanisms, including by calcineurin signaling, by mTOR signaling and by the cell-cycle regulators, CDK4/6<sup>45,46</sup>. Increasing intracellular calcium levels in MCF10A cells activated the GCaMP3-TRPML1 calcium sensor, demonstrating an increase in lysosomal Ca<sup>2+</sup> content and export<sup>47</sup> (Supplemental Fig. 3A). As expected, this was also associated with nuclear translocation of NFAT, a standard bioassay of calcineurin activity<sup>48</sup> (Supplemental Fig. 3B). However, TGF $\beta$ 3 did not similarly activate NFAT, and treatment of MCF10A cells with the calcineurin inhibitor, cyclosporin A, did not prevent the increase in expression of



2 TFEB target genes, LAMP2 and Cathepsin B, in response to either calcium and ionomycin or to TGF $\beta$ 3 (Supplemental Fig. 3B&C). We also examined whether treating MCF10A cells with calcium and ionomycin or TGF $\beta$ 3 inhibited mTOR signaling, which has been reported to cause nuclear accumulation of TFEB<sup>49,50</sup>. However, treatment with calcium and ionomycin or with TGF $\beta$ 3 appeared to promote mTOR activity (Supplemental Fig. 3D). Thus, neither activation of calcineurin activity nor inhibition of mTOR appeared to explain the increase in total and nuclear TFEB in response to calcium/ionomycin or TGF $\beta$ 3.

We next focused on the possibility that alterations in cell cycle regulation might affect TFEB expression and/or nuclear translocation given that TGF $\beta$  signaling is known to modulate cell cycle progression<sup>51</sup> and that CDK4/6 have been shown to phosphorylate TFEB, inhibiting its nuclear localization<sup>46</sup>. In support of this possibility, ingenuity pathway analysis of the previously described mammary gland RNAseq data comparing lactating and 48hrs of involution showed that involution was associated with upregulation of the “senescence” pathway and downregulation of the “cyclin and cell cycle regulation” and “cell cycle control of chromosomal replication” pathways (Fig. 6A). In addition, gene set enrichment analyses showed significant decreases in genes involved in the following KEGG pathways: cell cycle, DNA replication, E2F targets, DNA repair and MYC targets (Fig. 6B). RNAseq data from MCF10A cells treated with calcium and ionomycin showed similar results. Ingenuity Pathway analysis demonstrated an increase in the “cell cycle: G2/M DNA damage checkpoint regulation” and “senescence” pathways along with a decrease in “cell cycle control of chromosomal replication” and “cyclins and cell cycle regulation” pathways (Fig. 6C). Gene set enrichment analyses

demonstrated a decrease in the expression of genes involved in KEGG hallmark pathways for cell cycle, DNA replication, DNA repair and MYC targets (Fig. 6D). Similarly, TGF $\beta$  treatment of MCF10A cells mirrored the results of calcium and ionomycin as well as the mammary gland involution pattern. As shown in Fig 6E, Ingenuity Pathway Analysis of RNAseq data from MCF10A cells treated with TGF $\beta$ 3 showed activation of the “senescence” pathway and inhibition of the “cell cycle control of chromosomal replication” and “cyclins and cell cycle regulation” pathways. Gene set enrichment analyses demonstrated that TGF $\beta$ 3 inhibited the expression of genes within KEGG hallmark pathways for DNA repair, cell cycle, DNA replication, E2F targets, UV response and MYC targets, V1 and V2 (Fig. 6F). These changes in gene expression support the idea that mammary gland involution, elevations in intracellular calcium and treatment with TGF $\beta$ 3 all are associated with inhibition of cell cycle progression.

TGF $\beta$  signaling is well known to cause cell-cycle arrest in the G1 phase, in part, by increasing the expression of the CDK inhibitor p21, which inhibits CDK4/6 activity and results in hypophosphorylation of retinoblastoma protein Rb<sup>52-54</sup>. We therefore examined p21 expression and phosphorylation of Rb in MCF10A cells treated with either calcium/ionomycin or TGF $\beta$ 3. In both instances, we saw an increase in the proportion of cells with nuclear staining for p21 and a decrease in the proportion of cells staining for nuclear pRb (Fig. 6G&H). We confirmed these immunofluorescence patterns by also performing immunoblots for p21 and pRb in nuclear extracts from MCF10A cells treated with either calcium/ionomycin or TGF $\beta$ 3. As shown, both calcium/ionomycin and TGF $\beta$ 3 caused an increase in p21 levels and a decrease in pRb levels in nuclear extracts of MCF10A cells (Fig. 6I&J). As predicted by these results,

calcium/ionomycin and TGF $\beta$ 3 reduced BrdU (Bromodeoxyuridine / 5-bromo-2'-deoxyuridine) incorporation as well (Fig. 6K). Finally, we used two CDK4/6 inhibitors, LY2835219 (Abemaciclib) and PD0332991 (Palbociclib), both of which are used in breast cancer patients, to see whether induction of cell cycle arrest in MCF10A cells would reproduce the effects of calcium/ionomycin or TGF $\beta$ 3 on TFEB activity. As shown in Figure 6, this was the case. Treatment of MCF10A cells with either PD0332991 or LY2835219 led to an increase in total and nuclear immunofluorescence for TFEB (Fig. 6L). Interestingly, LY2835219, but not PD0332991, also increased TFEB gene expression (Fig 6M). Despite this difference, gene expression was increased for LAMP2 and Cathepsin B, both known targets of TFEB (Fig. 6N). Since we had previously shown that TGF $\beta$  treatment led to a reduction in SOCS3 protein levels and increase in gene expression, we also examined the effects of LY2835219 and PD0332991 on SOCS3 protein levels and *Socs3* gene expression. LY2835219 and PD0332991 treatment led to the same reciprocal decrease in SOCS3 protein levels and increase in *Socs3* gene expression as we had seen with TGF $\beta$ 3 treatment (Supplemental Fig. 4A&B). The effect of LY2835219 and PD0332991 was not blunted by a pan-TGF $\beta$  blocking antibody (Supplemental Fig. 4A&B). Taken together, these data suggest that, during early involution, increased intracellular calcium and TGF $\beta$ 3 act to induce cell cycle arrest, which, in turn, increases TFEB expression, nuclear localization and signaling to increase lysosome biogenesis, which, in turn, contributes to the coordinated LDCD pathway (Supplemental Fig. 4C).

## Discussion

The coordinated death of MECs upon weaning is an important feature of mammalian reproduction that allows for the cyclical production of milk following multiple pregnancies, while avoiding the energetic burden of maintaining constant milk production between pregnancies<sup>1,3,4,7</sup>. Therefore, it is important to better understand the molecular mechanisms that underlie this process. A series of studies have provided the following working model of early involution: alveolar distension due to milk retention increases cytokine production and activates STAT3, which, in turn, triggers lysosome-mediated cell death pathways<sup>2,7,8,10,13,14,16,24,28,29</sup>. However, the mechanisms by which milk stasis activates cytokine production and STAT3 phosphorylation have been less clear. We now present evidence demonstrating that milk stasis rapidly decreases the expression of the calcium pump, PMCA2, causing a dramatic and sustained increase in intracellular Ca<sup>2+</sup> concentration. This rise in intracellular Ca<sup>2+</sup> activates LIF, TGFβ3, and IL-6 production, inhibits cell cycle progression, triggers SOCS3 degradation, activates STAT3 signaling, and activates TFEB signaling, all of which contribute to the initiation of LDCD. Interestingly, the fall in PMCA2 levels as well as the increase in intracellular Ca<sup>2+</sup> generally precede, and are sufficient for the increase in LIF, TGFβ3 and IL6 expression, all cytokines that have previously been suggested to mediate the effects of milk stasis on cell death<sup>8-10,13,14</sup>. In addition, increased cellular Ca<sup>2+</sup> levels correlate with an inhibition in cell cycle progression and increased TFEB signaling. Finally, the effects of calcium appear to be mediated, at least in part, by increased TGFβ signaling. Our observations suggest a working model (Supplemental Fig. 4C), whereby the rise in intracellular Ca<sup>2+</sup> acts as an early biochemical signal for activation of STAT3. Increased

intracellular calcium also increases local cytokine production, TFEB activation and lysosome biogenesis leading to an amplification of STAT3 activation, and an increase in lysosomal mass, both of which support the full development of LDCD.

Prior work had shown that physical distension of MECs could lead to reduced expression of PMCA2<sup>20</sup>. We had also shown that changing the levels of PMCA2 expression altered intracellular Ca<sup>2+</sup> levels in MECs and breast cancer cells *in vitro*<sup>20,55,56</sup>. Our current studies demonstrate that weaning causes a clear and early increase in intracellular Ca<sup>2+</sup> after levels of PMCA2 decline in MECs *in vivo*. We utilized Ai95D mice which were engineered to encode the genetic GCaMP6f, calcium-indicator protein with a floxed-STOP cassette, at the ROSA locus<sup>25,26</sup>. When these mice were bred to BLG-Cre mice, GCaMP6f expression was activated only in MECs at the transition from pregnancy to lactation. Although the GCaMP6f calcium sensor was designed to respond to rapid increases in Ca<sup>2+</sup> as a result of neuronal action potentials, in our hands, it was a reliable indicator of persistent elevations in cytoplasmic Ca<sup>2+</sup> that could easily be detected using intravital multiphoton imaging of the mammary glands. Importantly, the Ai95D mice allowed us to document that weaning causes a sustained increase in intracellular Ca<sup>2+</sup> *in vivo*. This confirms prior studies in cultured cells, and is consistent with the induction of LDCD by elevated intracellular Ca<sup>2+</sup> levels in neurons and pancreatic epithelial cells<sup>17,18,57-60</sup>. It is also interesting to note that baseline cytoplasmic calcium levels during lactation were low despite the large amounts of calcium that transit through MECs and into milk. This supports the suggestion that there are very effective mechanisms sequestering calcium within intracellular compartments in milk-producing cells<sup>61-63</sup>.

Our results demonstrate that increased intracellular  $\text{Ca}^{2+}$  activates STAT3 by decreasing SOCS3 levels. The decrease in SOCS3 protein occurs despite a reciprocal increase in SOCS3 mRNA levels, suggesting that increased  $\text{Ca}^{2+}$  triggers degradation of SOCS3 protein, disinhibiting STAT3-induced expression of the *Socs3* gene. Sutherland and colleagues had previously reported that mammary-specific disruption of the *Socs3* gene led to premature STAT3 phosphorylation and cell death during lactation, mirroring the phenotype of lactating PMCA2-null mice<sup>33,34</sup>. Furthermore, the authors demonstrated an increase in *Socs3* mRNA in control animals 24-hours after weaning, findings consistent with our data. Additionally, we found that the calcium-induced reduction in SOCS3 levels can be mediated by increased TGF $\beta$  signaling and that the effects of TGF $\beta$ 3 on SOCS3 appear to involve the inhibition of cell cycle progression as the reductions in SOCS3 levels can be reproduced by pharmacologic inhibition of CDK4/6 activity. SOCS3 has previously been shown to interact with cell cycle regulators but it is thought to contribute to cell cycle arrest by magnifying p53-mediated upregulation of the cyclin dependent kinase inhibitor, CDKN1A or p21<sup>64,65</sup>. Our observations of decreased levels of SOCS3 in the setting of increased p21 levels do not fit this model; therefore, further work will be required to understand how inhibition of CDK4/6 decreases SOCS3 protein levels in mammary epithelial cells.

Activation of the LDCD pathway during early mammary gland involution is associated with an increase in the number and size of lysosomes<sup>8</sup>. Lysosome biogenesis is coordinated by the transcription factor, TFEB, which upregulates a network of genes encoding proteins important to the structure and function of lysosomes, including cathepsin B and LAMP2<sup>42,43,66</sup>. We found that milk stasis and

loss of PMCA2 expression both upregulate TFEB expression and nuclear localization *in vivo*. This was associated with an increase in TFEB-regulated genes in previously published RNAseq data from involuting mouse mammary glands <sup>44</sup>. We also demonstrated that increased intracellular Ca<sup>2+</sup> increases TFEB expression and nuclear localization in mammary epithelial cells *in vitro* and this was also associated with an upregulation of TFEB-regulated genes based on RNAseq data. Furthermore, as with SOCS3 degradation, the activation of TFEB in response to calcium appears to be mediated, in part, by TGFβ signaling since TGFβ3 can reproduce the effects of increased intracellular calcium. Furthermore, our data demonstrate a clear reciprocal relationship between activation of TFEB pathways and inhibition of cell cycle progression based on RNAseq data in involuting mammary glands *in vivo* and in MCF10A cells treated with either calcium/ionomycin or TGFβ3. These data suggest that the inhibition of cell cycle progression may mediate the effects of intracellular calcium and TGFβ3 on TFEB expression and nuclear localization. Although intracellular calcium and TGFβ have complex relationships with cell cycle regulation <sup>51</sup>, inhibition of cell cycle progression has been shown to promote nuclear localization of TFEB and activation of TFEB-associated gene expression <sup>45,46</sup>. It has been shown that CDK4/6 can directly phosphorylate TFEB leading to its nuclear exclusion and degradation <sup>45</sup>, findings consistent with our observations that pharmacologic inhibition of cell cycle progression using 2 different CDK4/6 inhibitors increases overall and nuclear TFEB levels as well as the expression of the downstream TFEB target genes cathepsin B and LAMP2. Thus, we propose that intracellular calcium and TGFβ3 increase TFEB signaling by inhibiting CDK-mediated cell cycle progression.

In summary, we present data identifying intracellular calcium as an important early signal linking milk stasis to mammary epithelial cell death. We found that milk retention causes a decrease in PMCA2 expression and a rise in intracellular  $\text{Ca}^{2+}$ . The increase in intracellular  $\text{Ca}^{2+}$ , in turn, activates STAT3 by degrading SOCS3, which is mediated by alterations in  $\text{TGF}\beta$  signaling and cell cycle arrest. These same pathways also mediate the effects of elevated intracellular calcium on TFEB signaling and lysosome expansion after weaning. We propose that these are proximal events important for the initiation and amplification of LDCD in MECs after weaning, a process that triggers death of secretory MECs and, ultimately, initiates the preparation of the mammary gland for a new cycle of reproduction.



## **Materials and Methods**

### **Cell culture**

MCF10A cells were cultured in DMEM/F12 (Gibco-Life Technologies) containing 5% horse serum, EGF (100ng/ml), hydrocortisone (1mg/ml), cholera toxin (1mg/ml), insulin (10mg/ml), and pen/strep (Gibco-Life Technologies) at 37°C in 5% CO<sub>2</sub><sup>56</sup>. In some experiment, cells were cultured under high calcium conditions (10 mM calcium + 1 μM ionomycin) for 16 hrs, or treated with TGFβ3 (10 nM) for 16 hrs. To inhibit STAT3, cells were treated with Galiella lactone (10 μM) (Tocris Bioscience, Atlanta, GA) for 16 hrs. To inhibit cell cycle progression, cells were treated with LY2835219 (2.5 μM) and PD0332991 (5 μM) (Selleckchem, Randnor, PA) for 16 hrs.

### **Genetically-altered mice**

PMCA2wt/dfw-2J mice were obtained from Jackson Laboratory (CByJ.A-Atp2b2dfw-2J/J, stock number 002894). Ai95(RCL-GCaMP6f)-D (Ai95) were a gift of the Lawrence Cohen laboratory at Yale University and were crossed with BLG-Cre mice, which were the gift of the Christine Watson Laboratory at the University of Cambridge. All animal experiments were approved by the Yale Institutional Animal Care and Use Committee.

### **Immunofluorescence**

Cells were grown on coverslips, fixed in 4% paraformaldehyde for 20 min, permeabilized with 0.2 % Triton X100 for 10 mins, washed 3 times with PBS and incubated with primary antibody overnight at 4°C. The cells were washed 3 times with

PBS and incubated with secondary antibody for 1 hour at room temperature. After washing, coverslips were mounted using Prolong Gold antifade reagent with DAPI (Invitrogen). Paraffin-embedded tissue sections were cleared with histoclear (National Diagnostics) and graded alcohol using standard techniques. Antigen retrieval was performed using 7mM citrate buffer, pH 6.0 under pressure. Sections were incubated with primary antibody overnight at 4°C and with secondary antibody for 1 hour at room temperature. Coverslips were mounted using Prolong Gold antifade reagent with DAPI (Invitrogen). All images were obtained using a Zeiss 780 confocal microscope and Zeiss LSM 880, and settings were adjusted to allow for detection of fine membrane structure. Primary antibodies were against: LAMP2 (ab13524) from Abcam (Cambridge, MA); PMCA2 (PA1-915) from Thermo Scientific (Waltham, MA); cathepsin B (PA5-17007) and TFEB (PA5-96632) from Invitrogen (Grand Island, NY); Phospho-STAT3 (9145), p21 (2947), p-Rb (8516) and NFAT (5861) from cell signaling (Danvers, MA).

### **Immunohistochemistry**

Paraffin-embedded tissue sections were cleared with histoclear (National Diagnostics) and graded alcohol using standard techniques. Immunohistochemistry was performed using standard techniques<sup>67</sup>. Antigen retrieval was accomplished by heating sections in 7 mM or 10 mM citrate, under pressure. Sections were incubated with primary antibody overnight at 4°C. Staining was detected using Vector Elite ABC Kits (Vector Laboratories, Burlingame, CA, USA) and 3,3-diaminobenzidine as chromogen (Vector Laboratories). Primary antibodies were against: phospho-STAT3

(9145), phospho-STAT5 (9314), CREB (9197), phospho-CREB (9198), and NFAT (5861), all from cell signaling (Danvers, MA) as well as TFEB (PA5-96632) from Invitrogen (Grand Island, NY).

### **Intravital multiphoton microscopy**

Mice were initially anaesthetized with an intraperitoneal injection of ketamine (15mg/mL) and xylazine (1mg/mL) in PBS and maintained throughout the course of the experiment with vaporized isoflurane, 1.5% in oxygen, on a heating pad maintaining temperature at 37°C. The abdomen was shaved using a mechanical trimmer and depilatory cream and the inguinal mammary gland was surgically exposed on a skin flap. The surrounding tissue was pinned to a silicone mount to stabilize and prewarmed PBS (37°C) was applied topically to the flap throughout the imaging procedure. A coverslip mounted on a micromanipulator was lowered onto the mammary gland prior to imaging.

Image stacks were acquired with a LaVision TriM Scope II (LaVision Biotec) microscope equipped with a Chameleon Vision II (Coherent) multiphoton laser. The laser was tuned to 880nm, focused through a  $\times 20$  water immersion lens (N.A. 1.0; Olympus) and scanned a field of view of 0.5 mm<sup>2</sup> at 800 Hz (0.48 $\mu$ m/pixel). Serial optical sections were acquired in 3- $\mu$ m steps to image a total depth of  $\sim 70\mu$ m of tissue. Larger regions were visualized using a motorized stage to automatically acquire sequential fields of view in a 3x3 grid with 4% overlap between regions. Laser power and imaging settings was consistently maintained between all replicates. Emitted

fluorescence was collected through two non-descanned detectors and separated through a dichroic (490nm) and bandpass filters (435/90 = blue, 525/50 = green).

Image stacks were initially stitched by a grid/collection stitching plugin in Fiji before importing into Imaris software v9.2.1 (Bitplane) for three-dimensional volume rendering. Surfaces were created based on the green-fluorescent signal and manually segmented into individual alveoli for analysis of their mean fluorescent intensity.

In vivo results represent samples from 3 individual mice for teat sealing experiments and 2 mice for the pup withdrawal and reintroduction experiments. An unpaired Student's *t*-test was used for all analyses with a *P* value of less than 0.05 accepted as indicating a significant difference. Statistical calculations were performed using the Prism (GraphPad).

## **Immunoblotting**

Protein extracts were prepared using standard methods<sup>55,56</sup>, subjected to SDS-PAGE and transferred to a nitrocellulose membrane by wet western blot transfer (Bio-Rad). The membrane was blocked in TBST buffer (TBS + 1% Tween) containing 5% milk for 1 hour at room temperature. The blocked membranes were incubated overnight at 4 °C with primary antibodies in Odyssey blocking buffer, 927-40000, washed 3 times with TBST buffer, and then incubated with secondary antibodies provided by LI-COR for 2 hours at room temperature. After 3 washes with TBST buffer, the membranes were analyzed using the ODYSSEY Infrared Imaging system (LI-COR). Primary antibodies were against: PMCA2 (PA1-915) from Thermo Scientific (Waltham, MA); phospho-STAT3 (9145), STAT3 (9139), p21 (2947), p-Rb (8516), SOCS3 (2923), Phospho-S6

Ribosomal Protein (Ser235/236) (4858), S6 Ribosomal Protein (5G10) (2217), Phospho-p70 S6 Kinase (Thr389) (9205), p70 S6 Kinase Antibody (9202), Phospho-ULK1 (Ser757) (D7O6U) (14202), and ULK1 (D8H5) (8054) from cell signaling (Danvers, MA); SOCS3 (HPA068569) from sigma (Burlington, MA); mouse (sc-69879) and rabbit (sc-130656)  $\beta$ -actin from Santa Cruz (Dallas, TX); TFEB (PA5-96632) and cathepsin B (PA5-17007) from Invitrogen (Grand Island, NY); SOCS3 (ab16030) from Abcam (Cambridge, MA). All immunoblot experiments were performed at least 3 times and representative blots are shown in the figures.

## **Cell Transfections**

Constructs encoding pCAG cyto-RCaMP1h (plasmid #105014), and GcaMP3-TRPML were a gift of Haoxing Xu in the University of Michigan. SKBR3 cells were transfected using Fugene6 transfection reagent (Invitrogen) according to the manufacturer's instructions.

## **RNA Extraction and Real-Time RT-PCR**

RNA was isolated using TRIzol (Invitrogen). Quantitative RT-PCR was performed with the SuperScript III Platinum One-Step qRT-PCR Kit (Invitrogen) using a Step One Plus Real-Time PCR System (Applied Biosystems) and the following TaqMan primer sets: human and mouse *Lif* (Hs01055668\_m1 and Mm00434761\_m1), mouse *PMCA2* (Mm00437640\_m1), human and mouse *CD14* (Hs02621496\_s1 and Mm00438094\_g1), human and mouse *LBP* (Hs01084628\_m1 and Mm00493139\_m1), human and mouse *IL6* (Hs00174131\_m1 and Mm00446190\_m1), human and mouse *SOCS3*

(Hs02330328\_s1 and Mm00545913\_s1), human and mouse TGF $\beta$ 3 (Hs01086000\_m1 and Mm00436960\_m1), human LAMP2 (Hs00174474\_m1), human ATG7 (Hs00893766\_m1), and human CTSB (Hs00947439\_m1), and human and mouse TFEB (Hs00292981\_m1 and Mm00448968\_m1). Human HPRT1 (4325801) and mouse GAPD (4351309) were used as reference genes (Invitrogen). Relative mRNA expression was determined using the Step One Software v2.2.2 (Applied Biosystems).

### **Bulk RNA sequencing**

RNA sequencing was performed by the Yale Center for Genome Analysis using the Illumina NovaSeq 6000 system, with 2x100 bp paired end. The sequencing reads were aligned onto the mouse GRCm38/mm10 and the Human GRCh38/hg38 reference genomes using the HISAT2 ver.2.1.0<sup>68</sup> software. The mapped reads were converted into the count matrix using StringTie2 ver. 2.1.4<sup>69</sup> with the default parameters, and provided to DESeq2 ver. 1.32.0<sup>70</sup> to identify differentially expressed genes (DEGs) based on a negative binomial generalized linear models. Genes that satisfy  $|\text{Log}_2 \text{ Fold Change}| \geq 0.25$  and adjusted p-values  $< 0.05$  were considered as statistically significant. The data visualization of the DEGs along with TFEB related genes and hierarchical clustered heatmaps were performed using the EnhancedHeatmap package<sup>71</sup> in R.

### **Statistics**

Statistical analyses were performed with Prism 7.0 (GraphPad Software, La Jolla, CA).

Statistical significance was determined by using unpaired t test for comparisons between 2 groups and one-way ANOVA for groups of 3 or more.

## **Acknowledgements**

We thank the Lawrence Cohen laboratory at Yale University for advice on genetically encoded calcium sensor mice and the gift of the Ai95(RCL-GCaMP6f)-D (Ai95) mice for our experiments. We thank Dr. Christine Watson from Cambridge University for valuable conversations and advice as well as the gift of the BLG-Cre mice. We thank Dr. Haoxing Xu in the University of Michigan for the plasmid of GcaMP3-TRPML. We thank the Yale Center for Advanced Light Microscopy Facility for their assistant, and the Bruker Opterra Swept Field Microscope was funded by shared instrument grant # NIH S10 OD023598. Our experiments were supported by the following grants: NRF-2018R1C1B6002803 from National Research Foundation of Korea (NRF) to W. Kim, RO1 GM105718 from NIH to S. Ferguson, Korea University Medical Center Grant to J. Choi, and R01 HD100468 and R01 HD076248 from the NIH to J. Wysolmerski.

## **Conflict of interest**

Nothing declared.

**Figure 1. Milk Stasis Increases Intracellular Calcium Levels.** A) Immunofluorescence for PMCA2 (1<sup>st</sup> column) and Immunohistochemistry for phospho-STAT3 (pSTAT3) (2<sup>nd</sup> and 3<sup>rd</sup> columns) at 0, 2, 4, 8, and 24 hours post teat-sealing of the 4<sup>th</sup> inguinal mammary gland. (representative images of n=3). 0 hours represents the unsealed contralateral lactating gland. Scale bars represents 10 $\mu$ m. B) Quantification of the percentage of pSTAT3-positive epithelial cells in Figure 1. C) Images obtained using multiphoton laser scanning microscopy at 0, 4, 8 and 24 hours post teat-sealing of a mammary gland using BLG-Cre;Ai95 females. The contralateral, unsealed gland served as a control (0 hours). (representative images of n=3). D) Mean Fluorescent Intensity (MFI) of MECs at 0 and 24 hours post teat-sealing (n=3). Mice without Cre expression served as controls. E) Immunofluorescence for Cathepsin B and LAMP2 at 0, 2, 4, 8, and 24 hours post teat-sealing mammary gland. Scale bars represents 10 $\mu$ m. (representative images of n=3). F) Western blot analysis of PMCA2 and Cathepsin B at 0, 2, 4, 8, and 24 hours post teat-sealing mammary gland. Quantification of changes relative to controls shown at right (n=3). G) PMCA2, Lif, TGF $\beta$ 3, CD14, LBP, and IL6 mRNA expression in mammary glands at 0, 4, 8, and 24 hours post teat-sealing, as assessed by quantitative RT-PCR (QPCR) (n=3). All bar graphs represent the mean $\pm$ SEM, \* denotes p<0.05, \*\* denotes p<0.005, \*\*\* denotes p<0.0005, \*\*\*\* denotes p<0.00005.

**Figure 2. Changes in PMCA2, intracellular calcium and pSTAT3 levels are reversible with reintroduction of suckling.** A) Experimental design. A, day 10 lactation as a control; B, 24 hours after pups removed at day 10 of lactation, C; 24 hours after pups reintroduced following 24-hours without suckling. B) PMCA2 mRNA expression,



assessed by QPCR from A, B, and C (n=4). C) Immunofluorescence for PMCA2 from tissue sections of A, B, and C. lower row is magnification of boxed areas from top row. White arrows point to apical plasma membrane. (n=4). Scale bars represents 10 $\mu$ m. D) Western blot analysis of PMCA2 from tissue extracts of A, B, and C. (n=4). E) Representative Images obtained using multiphoton laser scanning microscopy from conditions A, B, and C using BLG-Cre;Ai95 females. (n=3). F) *lif*, *TGF $\beta$ 3*, *CD14*, *LBP*, and *IL6* mRNA levels in mammary glands harvested from conditions A, B, and C, assessed by QPCR (n=4). G) Immunohistochemistry for pSTAT3 and pSTAT5 in mammary glands harvested from conditions A, B, and C. H) Immunofluorescence for Cathepsin B and LAMP2 in mammary glands harvested from conditions A, B, and C. White arrows point to enlarged lysosomes. Scale bars represents 10 $\mu$ m. I) Western blot analysis of Cathepsin B from tissue extracts of mammary glands harvested from conditions A, B, and C. (n=4). All bar graphs represent the mean $\pm$ SEM. \* denotes p<0.05, \*\* denotes p<0.005, \*\*\* denotes p<0.0005, \*\*\*\* denotes p<0.00005.

**Figure 3. Loss of PMCA2 prematurely activates LDCD during lactation.** A) Immunohistochemistry for pSTAT3 in mammary glands of control and PMCA2-null mice on day 10 of lactation. Quantitation of the percentage of MECs staining for pSTAT3 (n=3). B) Western blot analysis of PMCA2, pSTAT3, and STAT3 in mammary glands from control and PMCA2 KO mice on day 10 of lactation. (n=3). C) Immunofluorescence for Cathepsin B and LAMP2 in mammary glands from control and PMCA2 KO mice on day 10 of lactation. Red arrow demonstrates enlarged lysosome containing cathepsin B. Scale bars represents 10 $\mu$ m. D) Western blot analysis for Cathepsin B in mammary gland

lysates from control and PMCA2 KO mice on day 10 of lactation (n=3). E) Lif, TGF $\beta$ 3, CD14, LBP, and IL6 mRNA expression assessed by QPCR in mammary glands from control and PMCA2 KO mice on day 10 of lactation. (n=6). Bar graphs represent the mean $\pm$ SEM. \* denotes p<0.05, \*\* denotes p<0.005, \*\*\* denotes p<0.0005, \*\*\*\* denotes p<0.00005.

**Figure 4. Calcium mediated TGF $\beta$  signaling activates STAT3 signaling by degrading SOCS3 protein.** A) Western blot analysis of SOCS3 in mammary glands harvested at 0, 2, 4, 8, and 24 hours post teat-sealing. (n=3). B) Socs3 mRNA expression assessed by QPCR in mammary glands harvested at 0, 2, 4, 8, and 24 hours post teat-sealing (n=3). C) Western blot analysis of SOCS3 in mammary glands from control and PMCA2 KO mice harvested on day 10 of lactation. (n=3). D) SOCS3 mRNA expression assessed by QPCR in mammary glands from control and PMCA2 KO mice harvested on day 10 of lactation. (n=6). E) Western blot analysis of SOCS3 from tissue extracts harvested from control lactating mice, mice 24 hrs. after teat sealing, and mice with re-suckling of mammary glands for 24 hours. (n=4). F) Socs3 mRNA expression assessed by QPCR in mammary glands harvested from control lactating mice, mice 24 hrs. after teat sealing, and mice with re-suckling of mammary glands for 24 hours (n=4). G) Western blot analysis of SOCS3 in MCF10A cell exposed to increasing calcium conditions (0, 2.5, 5, 10mM calcium + 1 $\mu$ M ionomycin). (n=3). H) SOCS3 mRNA expression assessed by QPCR in MCF10A cells exposed to control and high calcium (10mM calcium + 1 $\mu$ M ionomycin) conditions (n=3). I) Western blot analysis of SOCS3 in MCF10A cells exposed to 10ng/ml TGF $\beta$ 3  $\pm$  2 $\mu$ g/ml pan-TGF $\beta$  antibody. (n=3). J) SOCS3 mRNA expression

assessed by QPCR in MCF10A cells exposed to 10ng/ml TGF $\beta$ 3, treated with 2 $\mu$ g/ml pan-TGF $\beta$  antibody (n=3). K) Western blot analysis of SOCS3 levels in MCF10A cells exposed to high calcium conditions (10mM calcium + 1 $\mu$ M ionomycin)  $\pm$  2 $\mu$ g/ml pan-TGF $\beta$  antibody. (n=3). L) SOCS3 mRNA expression in MCF10A cells under high calcium condition (10mM calcium + 1 $\mu$ M ionomycin)  $\pm$  2 $\mu$ g/ml pan-TGF $\beta$  antibody, assessed by QPCR. (n=3). M) SOCS3 mRNA expression assessed by QPCR in MCF10A cells exposed to 10ng/ml TGF $\beta$ 3  $\pm$  10 $\mu$ M/ml of Galiella lactone (n=3). N) Ingenuity Pathways Analysis (IPA) from RNAseq compared between control MCF10A cells versus either high calcium condition (10mM calcium + 1 $\mu$ M ionomycin) or 10ng/ml TGF $\beta$ 3 which highlights the activation of JAK-STAT3 signaling. Bar graphs represent the mean $\pm$ SEM. \* denotes p<0.05, \*\* denotes p<0.005, \*\*\* denotes p<0.0005, \*\*\*\* denotes p<0.00005.

**Figure 5. Calcium mediated TFEB signaling to increase lysosomal biogenesis.** A) Immunofluorescence for LAMP2 in mammary glands from control mice on day 10 of lactation, 24 hrs after teat-sealing, and day 10 PMCA2 KO lactation. Scale bars represents 10 $\mu$ m. B) Immunohistochemistry for TFEB in mammary glands from control mice on day 10 of lactation, 24 hrs after teat-sealing, and day 10 PMCA2 KO lactation. C) TFEB mRNA expression assessed by QPCR in mammary glands harvested from day 10 lactating mice, mice 24 hrs. after teat sealing (n=3), and day 10 lactating PMCA2 KO mice (n=6). D) TFEB mRNA expression assessed by QPCR in mammary glands harvested from control lactating mice, mice 24 hrs. after teat sealing, and mice with re-suckling of mammary glands for 24 hours (n=4). E) KEGG gene set enrichment plot of lysosome and autophagy pathway from RNAseq results compared between day 10

lactation and day 2 involution in the mammary gland. F-G) Volcano and Heatmap plot which highlighted with TFEB associated genes from RNAseq results compared between day 10 lactation and day 2 involution in the mammary gland. H) Immunofluorescence for TFEB under high calcium condition (10mM calcium + 1 $\mu$ M ionomycin)  $\pm$  2 $\mu$ g/ml pan-TGF $\beta$  antibody. Scale bars represents 10 $\mu$ m. I) TFEB mRNA expression in MCF10A cells under high calcium condition (10mM calcium + 1 $\mu$ M ionomycin)  $\pm$  2 $\mu$ g/ml pan-TGF $\beta$  antibody, assessed by QPCR. (n=3). J-K) Volcano and Heatmap plot which highlighted with TFEB associated genes from RNAseq results compared between control and high calcium condition (10mM calcium + 1 $\mu$ M ionomycin) treated MCF10A cells. L) KEGG gene set enrichment plot of lysosome pathway from RNAseq results compared between control and high calcium condition (10mM calcium + 1 $\mu$ M ionomycin) in MCF10A cells. M) Immunofluorescence for TFEB in MCF10A cells exposed to 10ng/ml TGF $\beta$ 3  $\pm$  2 $\mu$ g/ml pan-TGF $\beta$  antibody. Scale bars represents 10 $\mu$ m. N) Western blot analysis of TFEB in MCF10A cells exposed to 10ng/ml TGF $\beta$ 3  $\pm$  2 $\mu$ g/ml pan-TGF $\beta$  antibody. (n=3). O) TFEB mRNA expression assessed by QPCR in MCF10A cells exposed to 10ng/ml TGF $\beta$ 3  $\pm$  2 $\mu$ g/ml pan-TGF $\beta$  antibody. (n=3). P-Q) Volcano and Heatmap plot which highlighted with TFEB associated genes from RNAseq results compared between control and 10ng/ml TGF $\beta$ 3 treated MCF10A cells. Bar graphs represent the mean $\pm$ SEM. \* denotes p<0.05, \*\* denotes p<0.005, \*\*\* denotes p<0.0005, \*\*\*\* denotes p<0.00005.

**Figure 6. TFEB signaling through intracellular calcium or TGF $\beta$ 3 is mediated by inhibition of cell cycle progression.** A) Ingenuity Pathways Analysis (IPA) which highlighted cell cycle related pathways from RNAseq results compared between day 10

lactation and day 2 involution in the mammary gland. B) Hallmark and KEGG gene set enrichment plot of cell cycle related pathways from RNAseq results compared between day 10 lactation and day 2 involution in the mammary gland. C) A) Ingenuity Pathways Analysis (IPA) which highlighted cell cycle related pathways from RNAseq results compared between control and high calcium condition (10mM calcium + 1 $\mu$ M ionomycin) in MCF10A cells. D) Hallmark and KEGG gene set enrichment plot of cell cycle related pathways from RNAseq results compared between control and high calcium condition (10mM calcium + 1 $\mu$ M ionomycin) in MCF10A cells. E) Ingenuity Pathways Analysis (IPA) which highlighted cell cycle related pathways from RNAseq results compared between control and 10ng/ml TGF $\beta$ 3 treated MCF10A cells. F) Hallmark and KEGG gene set enrichment plot of cell cycle related pathways from RNAseq results between control and 10ng/ml TGF $\beta$ 3 treated MCF10A cells. G) Immunofluorescence for p21 and p-rb under high calcium condition (10mM calcium + 1 $\mu$ M ionomycin). Scale bars represents 10 $\mu$ m. H) Immunofluorescence for p21 and p-rb in MCF10A cells exposed to 10ng/ml TGF $\beta$ 3. Scale bars represents 10 $\mu$ m. I) Western blot analysis of nuclear p21 and p-rb in MCF10A cells under high calcium condition (10mM calcium + 1 $\mu$ M ionomycin). (n=3). J) Western blot analysis of nuclear p21 and p-rb in MCF10A cells exposed to 10ng/ml TGF $\beta$ 3. (n=3). K) Measurement of BrdU incorporation in control, high calcium condition (10mM calcium + 1 $\mu$ M ionomycin), and 10ng/ml TGF $\beta$ 3 treated MCF10A cells. L) Immunofluorescence for TFEB in MCF10A cells exposed to 2.5 $\mu$ M LY2835219 and 5 $\mu$ M PD0332991. Scale bars represents 10 $\mu$ m. M) TFEB mRNA expression assessed by QPCR in MCF10A cells exposed to 2.5 $\mu$ M LY2835219 and 5 $\mu$ M PD0332991. (n=3). N) LAMP2 and Cathepsin B mRNA expression assessed by QPCR in MCF10A cells exposed to 2.5 $\mu$ M LY2835219

and 5 $\mu$ M PD0332991. (n=3). Bar graphs represent the mean $\pm$ SEM. \* denotes p<0.05, \*\* denotes p<0.005, \*\*\* denotes p<0.0005, \*\*\*\* denotes p<0.00005.

## References

- 1 Baxter, F. O., Neoh, K. & Tevendale, M. C. The beginning of the end: death signaling in early involution. *J Mammary Gland Biol Neoplasia* **12**, 3-13, doi:10.1007/s10911-007-9033-9 (2007).
- 2 Stein, T., Salomonis, N. & Gusterson, B. A. Mammary gland involution as a multi-step process. *J Mammary Gland Biol Neoplasia* **12**, 25-35, doi:10.1007/s10911-007-9035-7 (2007).
- 3 Watson, C. J. Involution: apoptosis and tissue remodelling that convert the mammary gland from milk factory to a quiescent organ. *Breast Cancer Res* **8**, 203, doi:10.1186/bcr1401 (2006).
- 4 Watson, C. J. Post-lactational mammary gland regression: molecular basis and implications for breast cancer. *Expert Rev Mol Med* **8**, 1-15, doi:10.1017/S1462399406000196 (2006).
- 5 Arnandis, T. *et al.* Calpains mediate epithelial-cell death during mammary gland involution: mitochondria and lysosomal destabilization. *Cell Death Differ* **19**, 1536-1548, doi:10.1038/cdd.2012.46 (2012).
- 6 Hernandez, L. L., Collier, J. L., Vomachka, A. J., Collier, R. J. & Horseman, N. D. Suppression of lactation and acceleration of involution in the bovine mammary gland by a selective serotonin reuptake inhibitor. *J Endocrinol* **209**, 45-54, doi:10.1530/JOE-10-0452 (2011).
- 7 Jena, M. K., Jaswal, S., Kumar, S. & Mohanty, A. K. Molecular mechanism of mammary gland involution: An update. *Dev Biol* **445**, 145-155, doi:10.1016/j.ydbio.2018.11.002 (2019).
- 8 Kreuzaler, P. A. *et al.* Stat3 controls lysosomal-mediated cell death in vivo. *Nat Cell Biol* **13**, 303-309, doi:10.1038/ncb2171 (2011).
- 9 Kritikou, E. A. *et al.* A dual, non-redundant, role for LIF as a regulator of development and STAT3-mediated cell death in mammary gland. *Development* **130**, 3459-3468, doi:10.1242/dev.00578 (2003).
- 10 Nguyen, A. V. & Pollard, J. W. Transforming growth factor beta3 induces cell death during the first stage of mammary gland involution. *Development* **127**, 3107-3118 (2000).
- 11 Quarrie, L. H., Addey, C. V. & Wilde, C. J. Programmed cell death during mammary tissue involution induced by weaning, litter removal, and milk stasis. *J Cell Physiol* **168**, 559-569, doi:10.1002/(SICI)1097-4652(199609)168:3<559::AID-JCP8>3.0.CO;2-O (1996).
- 12 Stein, T. *et al.* Involution of the mouse mammary gland is associated with an immune cascade and an acute-phase response, involving LBP, CD14 and STAT3. *Breast Cancer Res* **6**, R75-91, doi:10.1186/bcr753 (2004).
- 13 Zhao, L. *et al.* Mammary gland remodeling depends on gp130 signaling through Stat3 and MAPK. *J Biol Chem* **279**, 44093-44100, doi:10.1074/jbc.M313131200 (2004).
- 14 Zhao, L., Melenhorst, J. J. & Hennighausen, L. Loss of interleukin 6 results in delayed mammary gland involution: a possible role for mitogen-activated protein kinase and not signal transducer and activator of transcription 3. *Mol Endocrinol* **16**, 2902-2912, doi:10.1210/me.2001-0330 (2002).
- 15 Lloyd-Lewis, B. *et al.* Stat3-mediated alterations in lysosomal membrane protein composition. *J Biol Chem* **293**, 4244-4261, doi:10.1074/jbc.RA118.001777 (2018).
- 16 Sargeant, T. J. *et al.* Stat3 controls cell death during mammary gland involution by regulating uptake of milk fat globules and lysosomal membrane permeabilization. *Nat Cell Biol* **16**, 1057-1068, doi:10.1038/ncb3043 (2014).
- 17 Wang, F., Gomez-Sintes, R. & Boya, P. Lysosomal membrane permeabilization and cell death. *Traffic* **19**, 918-931, doi:10.1111/tra.12613 (2018).
- 18 Windelborn, J. A. & Lipton, P. Lysosomal release of cathepsins causes ischemic damage in the rat hippocampal slice and depends on NMDA-mediated calcium influx, arachidonic acid

- metabolism, and free radical production. *J Neurochem* **106**, 56-69, doi:10.1111/j.1471-4159.2008.05349.x (2008).
- 19 VanHouten, J. N., Neville, M. C. & Wysolmerski, J. J. The calcium-sensing receptor regulates plasma membrane calcium adenosine triphosphatase isoform 2 activity in mammary epithelial cells: a mechanism for calcium-regulated calcium transport into milk. *Endocrinology* **148**, 5943-5954, doi:10.1210/en.2007-0850 (2007).
- 20 VanHouten, J. *et al.* PMCA2 regulates apoptosis during mammary gland involution and predicts outcome in breast cancer. *Proc Natl Acad Sci U S A* **107**, 11405-11410, doi:10.1073/pnas.0911186107 (2010).
- 21 Brini, M. Plasma membrane Ca(2+)-ATPase: from a housekeeping function to a versatile signaling role. *Pflugers Arch* **457**, 657-664, doi:10.1007/s00424-008-0505-6 (2009).
- 22 Brini, M., Cali, T., Ottolini, D. & Carafoli, E. The plasma membrane calcium pump in health and disease. *FEBS J* **280**, 5385-5397, doi:10.1111/febs.12193 (2013).
- 23 Strehler, E. E. & Zacharias, D. A. Role of alternative splicing in generating isoform diversity among plasma membrane calcium pumps. *Physiol Rev* **81**, 21-50, doi:10.1152/physrev.2001.81.1.21 (2001).
- 24 Li, M. *et al.* Mammary-derived signals activate programmed cell death during the first stage of mammary gland involution. *Proc Natl Acad Sci U S A* **94**, 3425-3430, doi:10.1073/pnas.94.7.3425 (1997).
- 25 Chen, T. W. *et al.* Ultrasensitive fluorescent proteins for imaging neuronal activity. *Nature* **499**, 295-300, doi:10.1038/nature12354 (2013).
- 26 Madisen, L. *et al.* Transgenic mice for intersectional targeting of neural sensors and effectors with high specificity and performance. *Neuron* **85**, 942-958, doi:10.1016/j.neuron.2015.02.022 (2015).
- 27 Selbert, S. *et al.* Efficient BLG-Cre mediated gene deletion in the mammary gland. *Transgenic Res* **7**, 387-396, doi:10.1023/a:1008848304391 (1998).
- 28 Chapman, R. S. *et al.* The role of Stat3 in apoptosis and mammary gland involution. Conditional deletion of Stat3. *Adv Exp Med Biol* **480**, 129-138, doi:10.1007/0-306-46832-8\_16 (2000).
- 29 Humphreys, R. C. *et al.* Deletion of Stat3 blocks mammary gland involution and extends functional competence of the secretory epithelium in the absence of lactogenic stimuli. *Endocrinology* **143**, 3641-3650, doi:10.1210/en.2002-220224 (2002).
- 30 Tait, L., Soule, H. D. & Russo, J. Ultrastructural and immunocytochemical characterization of an immortalized human breast epithelial cell line, MCF-10. *Cancer Res* **50**, 6087-6094 (1990).
- 31 Akerboom, J. *et al.* Genetically encoded calcium indicators for multi-color neural activity imaging and combination with optogenetics. *Front Mol Neurosci* **6**, 2, doi:10.3389/fnmol.2013.00002 (2013).
- 32 Mahony, R., Ahmed, S., Diskin, C. & Stevenson, N. J. SOCS3 revisited: a broad regulator of disease, now ready for therapeutic use? *Cell Mol Life Sci* **73**, 3323-3336, doi:10.1007/s00018-016-2234-x (2016).
- 33 Sutherland, K. D., Lindeman, G. J. & Visvader, J. E. Knocking off SOCS genes in the mammary gland. *Cell Cycle* **6**, 799-803, doi:10.4161/cc.6.7.4037 (2007).
- 34 Sutherland, K. D. *et al.* c-myc as a mediator of accelerated apoptosis and involution in mammary glands lacking Socs3. *EMBO J* **25**, 5805-5815, doi:10.1038/sj.emboj.7601455 (2006).
- 35 Zhang, L. *et al.* IL-6 signaling via the STAT3/SOCS3 pathway: functional analysis of the conserved STAT3 N-domain. *Mol Cell Biochem* **288**, 179-189, doi:10.1007/s11010-006-9137-3 (2006).
- 36 Carow, B. & Rottenberg, M. E. SOCS3, a Major Regulator of Infection and Inflammation. *Front Immunol* **5**, 58, doi:10.3389/fimmu.2014.00058 (2014).



- 37 Lesina, M. *et al.* Stat3/Socs3 activation by IL-6 transsignaling promotes progression of pancreatic intraepithelial neoplasia and development of pancreatic cancer. *Cancer Cell* **19**, 456-469, doi:10.1016/j.ccr.2011.03.009 (2011).
- 38 Guadagnin, E., Mazala, D. & Chen, Y. W. STAT3 in Skeletal Muscle Function and Disorders. *Int J Mol Sci* **19**, doi:10.3390/ijms19082265 (2018).
- 39 Itoh, Y., Saitoh, M. & Miyazawa, K. Smad3-STAT3 crosstalk in pathophysiological contexts. *Acta Biochim Biophys Sin (Shanghai)* **50**, 82-90, doi:10.1093/abbs/gmx118 (2018).
- 40 Hassona, Y., Cirillo, N., Heesom, K., Parkinson, E. K. & Prime, S. S. Senescent cancer-associated fibroblasts secrete active MMP-2 that promotes keratinocyte dis-cohesion and invasion. *Br J Cancer* **111**, 1230-1237, doi:10.1038/bjc.2014.438 (2014).
- 41 Godfrey, W. R. *et al.* Cord blood CD4(+)CD25(+)-derived T regulatory cell lines express FoxP3 protein and manifest potent suppressor function. *Blood* **105**, 750-758, doi:10.1182/blood-2004-06-2467 (2005).
- 42 Napolitano, G. & Ballabio, A. TFEB at a glance. *J Cell Sci* **129**, 2475-2481, doi:10.1242/jcs.146365 (2016).
- 43 Raben, N. & Puertollano, R. TFEB and TFE3: Linking Lysosomes to Cellular Adaptation to Stress. *Annu Rev Cell Dev Biol* **32**, 255-278, doi:10.1146/annurev-cellbio-111315-125407 (2016).
- 44 Acosta, D. *et al.* LPA receptor activity is basal specific and coincident with early pregnancy and involution during mammary gland postnatal development. *Sci Rep* **6**, 35810, doi:10.1038/srep35810 (2016).
- 45 Brady, O. A. *et al.* The transcription factors TFE3 and TFEB amplify p53 dependent transcriptional programs in response to DNA damage. *Elife* **7**, doi:10.7554/eLife.40856 (2018).
- 46 Yin, Q. *et al.* CDK4/6 regulate lysosome biogenesis through TFEB/TFE3. *J Cell Biol* **219**, doi:10.1083/jcb.201911036 (2020).
- 47 Medina, D. L. *et al.* Lysosomal calcium signalling regulates autophagy through calcineurin and TFEB. *Nat Cell Biol* **17**, 288-299, doi:10.1038/ncb3114 (2015).
- 48 Park, Y. J., Yoo, S. A., Kim, M. & Kim, W. U. The Role of Calcium-Calcineurin-NFAT Signaling Pathway in Health and Autoimmune Diseases. *Front Immunol* **11**, 195, doi:10.3389/fimmu.2020.00195 (2020).
- 49 Rocznik-Ferguson, A. *et al.* The transcription factor TFEB links mTORC1 signaling to transcriptional control of lysosome homeostasis. *Sci Signal* **5**, ra42, doi:10.1126/scisignal.2002790 (2012).
- 50 Napolitano, G. *et al.* mTOR-dependent phosphorylation controls TFEB nuclear export. *Nat Commun* **9**, 3312, doi:10.1038/s41467-018-05862-6 (2018).
- 51 Zhang, Y., Alexander, P. B. & Wang, X. F. TGF-beta Family Signaling in the Control of Cell Proliferation and Survival. *Cold Spring Harb Perspect Biol* **9**, doi:10.1101/cshperspect.a022145 (2017).
- 52 Datto, M. B. *et al.* Transforming growth factor beta induces the cyclin-dependent kinase inhibitor p21 through a p53-independent mechanism. *Proc Natl Acad Sci U S A* **92**, 5545-5549, doi:10.1073/pnas.92.12.5545 (1995).
- 53 Donovan, J. & Slingerland, J. Transforming growth factor-beta and breast cancer: Cell cycle arrest by transforming growth factor-beta and its disruption in cancer. *Breast Cancer Res* **2**, 116-124, doi:10.1186/bcr43 (2000).
- 54 Polyak, K. *et al.* p27Kip1, a cyclin-Cdk inhibitor, links transforming growth factor-beta and contact inhibition to cell cycle arrest. *Genes Dev* **8**, 9-22, doi:10.1101/gad.8.1.9 (1994).
- 55 Jeong, J. *et al.* PMCA2 regulates HER2 protein kinase localization and signaling and promotes HER2-mediated breast cancer. *Proc Natl Acad Sci U S A* **113**, E282-290, doi:10.1073/pnas.1516138113 (2016).

- 56 Jeong, J. *et al.* The scaffolding protein NHERF1 regulates the stability and activity of the tyrosine kinase HER2. *J Biol Chem* **292**, 6555-6568, doi:10.1074/jbc.M116.770883 (2017).
- 57 Dauer, P. *et al.* Inhibition of Sp1 prevents ER homeostasis and causes cell death by lysosomal membrane permeabilization in pancreatic cancer. *Sci Rep* **7**, 1564, doi:10.1038/s41598-017-01696-2 (2017).
- 58 Malik, B. R., Maddison, D. C., Smith, G. A. & Peters, O. M. Autophagic and endo-lysosomal dysfunction in neurodegenerative disease. *Mol Brain* **12**, 100, doi:10.1186/s13041-019-0504-x (2019).
- 59 Orabi, A. I. *et al.* Targeted inhibition of pancreatic acinar cell calcineurin is a novel strategy to prevent post-ERCP pancreatitis. *Cell Mol Gastroenterol Hepatol* **3**, 119-128, doi:10.1016/j.jcmgh.2016.08.006 (2017).
- 60 Wen, L. *et al.* Transient High Pressure in Pancreatic Ducts Promotes Inflammation and Alters Tight Junctions via Calcineurin Signaling in Mice. *Gastroenterology* **155**, 1250-1263 e1255, doi:10.1053/j.gastro.2018.06.036 (2018).
- 61 Cross, B. M., Breitwieser, G. E., Reinhardt, T. A. & Rao, R. Cellular calcium dynamics in lactation and breast cancer: from physiology to pathology. *Am J Physiol Cell Physiol* **306**, C515-526, doi:10.1152/ajpcell.00330.2013 (2014).
- 62 Davis, F. M. The ins and outs of calcium signalling in lactation and involution: Implications for breast cancer treatment. *Pharmacol Res* **116**, 100-104, doi:10.1016/j.phrs.2016.12.007 (2017).
- 63 Grinman, D., Athonvarungkul, D., Wysolmerski, J. & Jeong, J. Calcium Metabolism and Breast Cancer: Echoes of Lactation? *Curr Opin Endocr Metab Res* **15**, 63-70, doi:10.1016/j.coemr.2020.11.006 (2020).
- 64 Sitko, J. C. *et al.* SOCS3 regulates p21 expression and cell cycle arrest in response to DNA damage. *Cell Signal* **20**, 2221-2230, doi:10.1016/j.cellsig.2008.08.011 (2008).
- 65 Khan, M. G. M. *et al.* Hepatocyte growth control by SOCS1 and SOCS3. *Cytokine* **121**, 154733, doi:10.1016/j.cyto.2019.154733 (2019).
- 66 Sardiello, M. *et al.* A gene network regulating lysosomal biogenesis and function. *Science* **325**, 473-477, doi:10.1126/science.1174447 (2009).
- 67 Foley, J. *et al.* Parathyroid hormone-related protein maintains mammary epithelial fate and triggers nipple skin differentiation during embryonic breast development. *Development* **128**, 513-525 (2001).
- 68 Kim, D., Langmead, B. & Salzberg, S. L. HISAT: a fast spliced aligner with low memory requirements. *Nat Methods* **12**, 357-360, doi:10.1038/nmeth.3317 (2015).
- 69 Kovaka, S. *et al.* Transcriptome assembly from long-read RNA-seq alignments with StringTie2. *Genome Biol* **20**, 278, doi:10.1186/s13059-019-1910-1 (2019).
- 70 Love, M. I., Huber, W. & Anders, S. Moderated estimation of fold change and dispersion for RNA-seq data with DESeq2. *Genome Biol* **15**, 550, doi:10.1186/s13059-014-0550-8 (2014).
- 71 Gu, Z., Eils, R., Schlesner, M. & Ishaque, N. EnrichedHeatmap: an R/Bioconductor package for comprehensive visualization of genomic signal associations. *BMC Genomics* **19**, 234, doi:10.1186/s12864-018-4625-x (2018).

Figure\_1

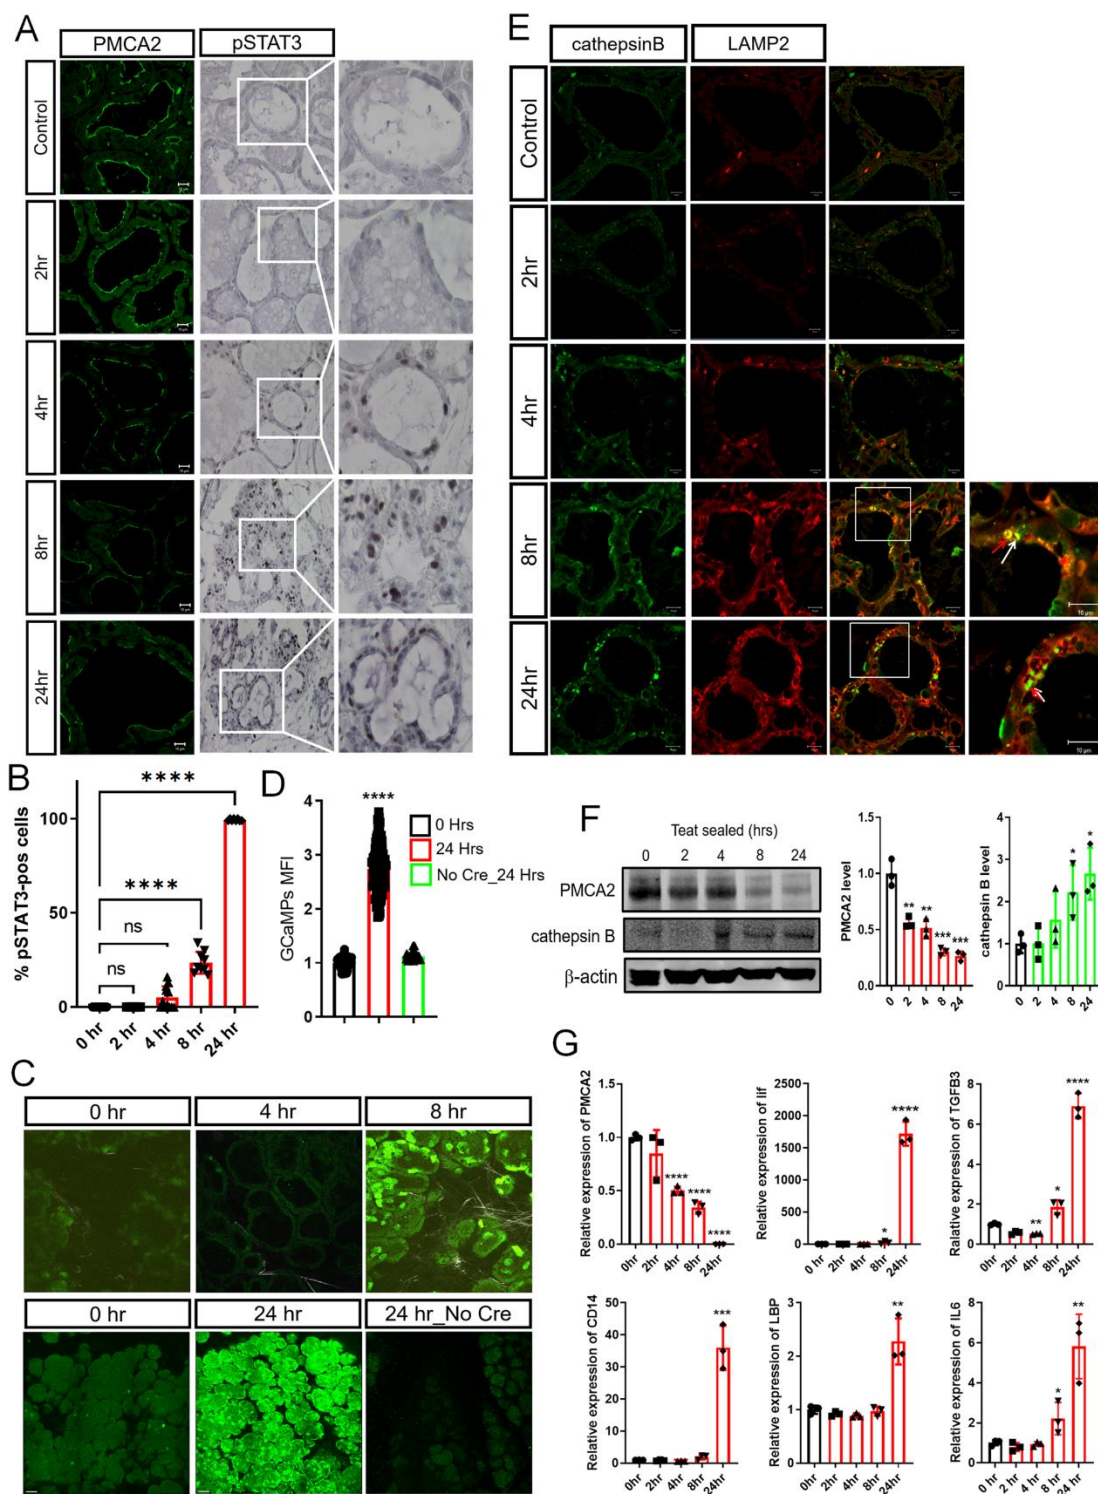

Figure\_2

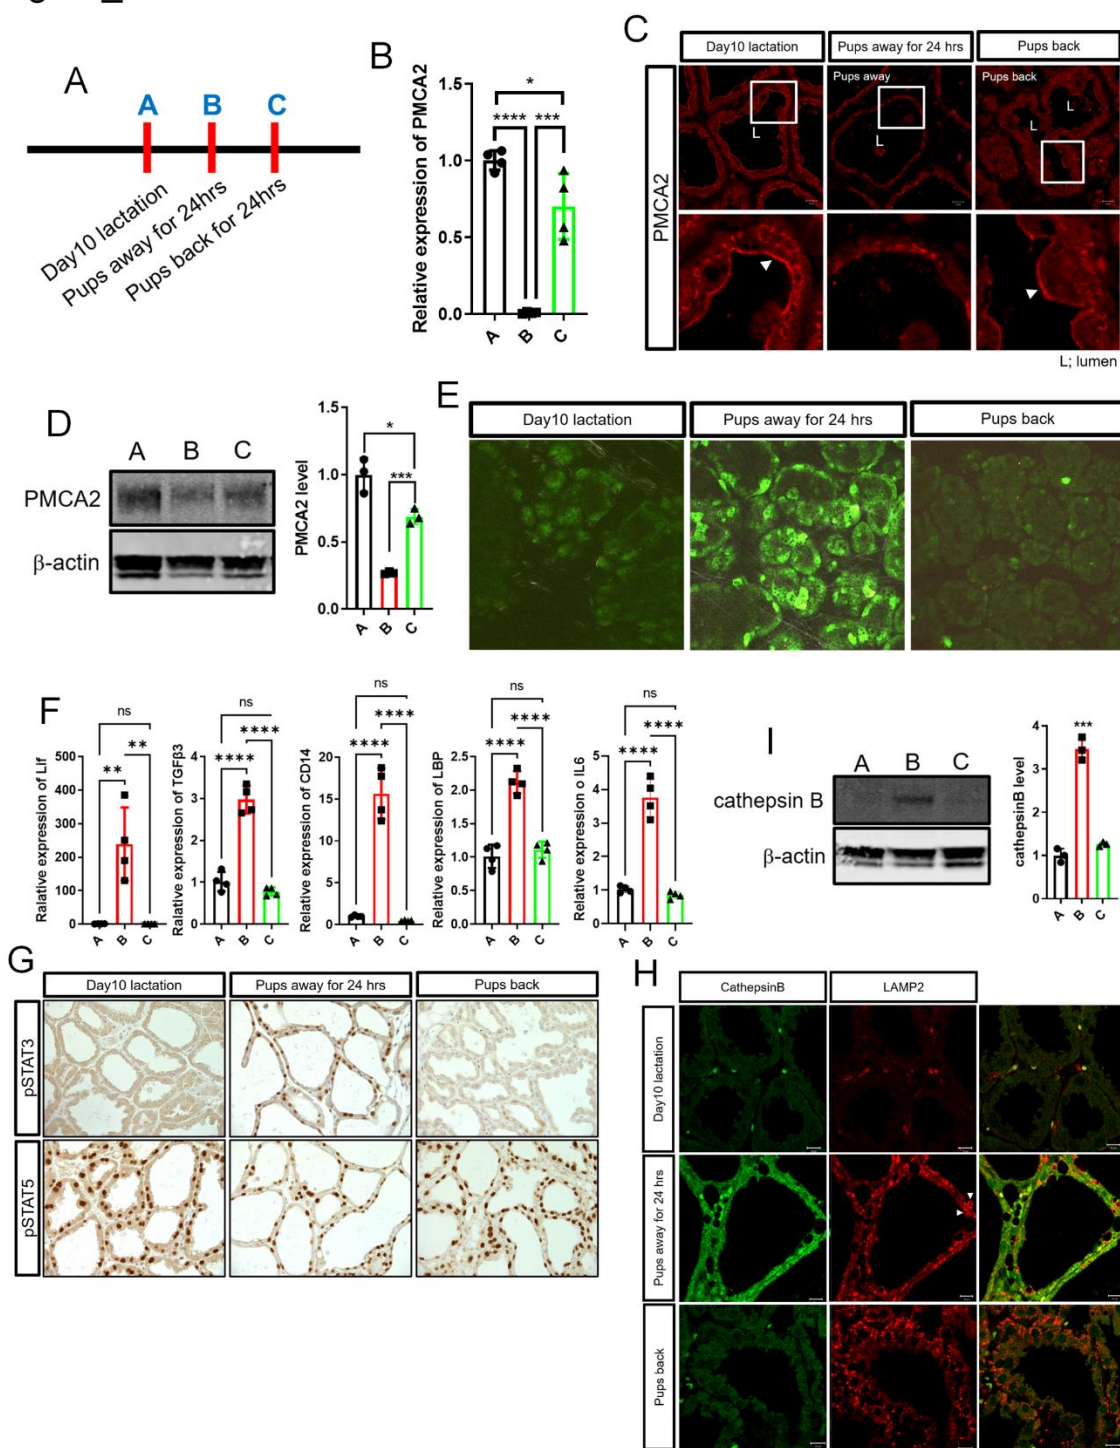

Figure\_3

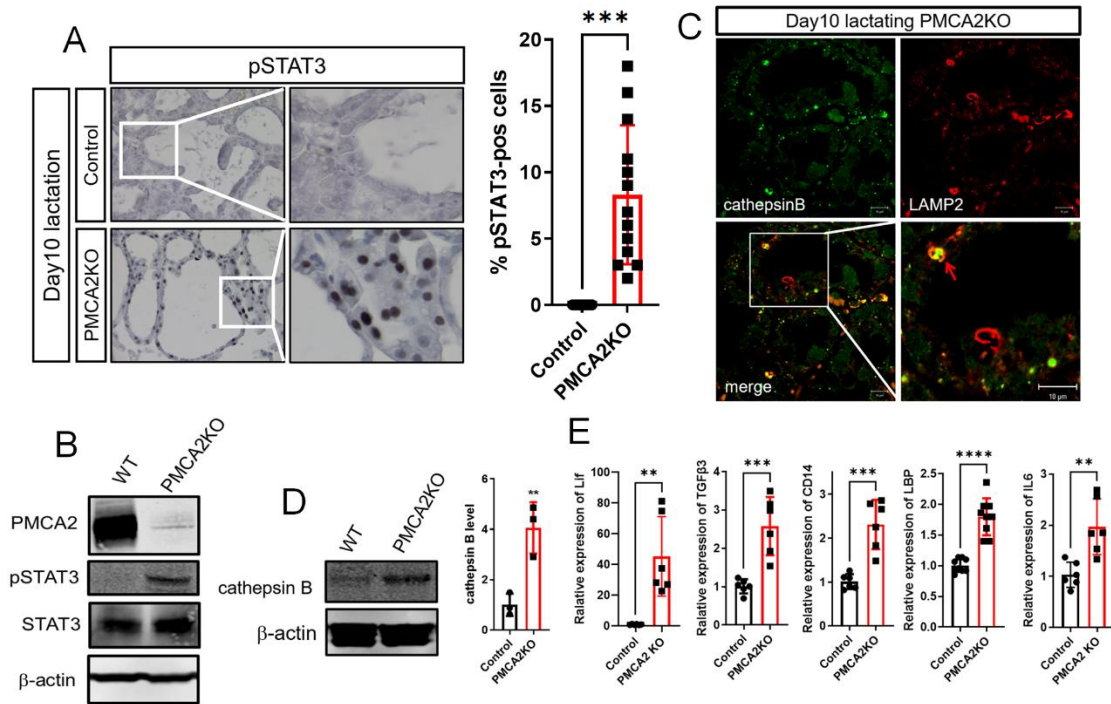

Figure\_4

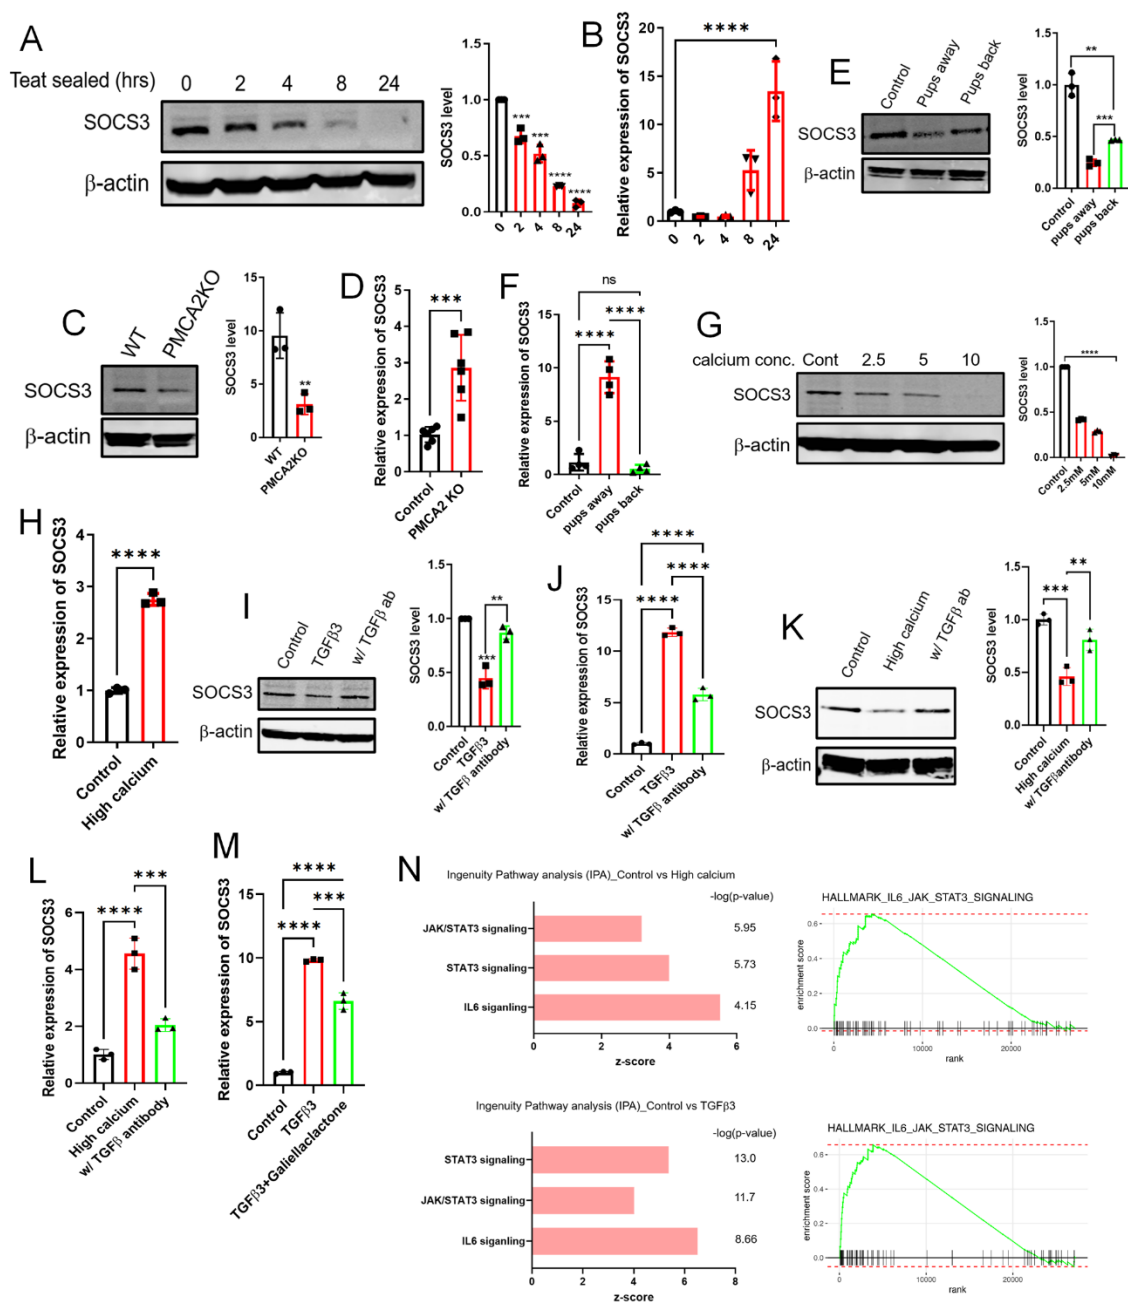

Figure\_5

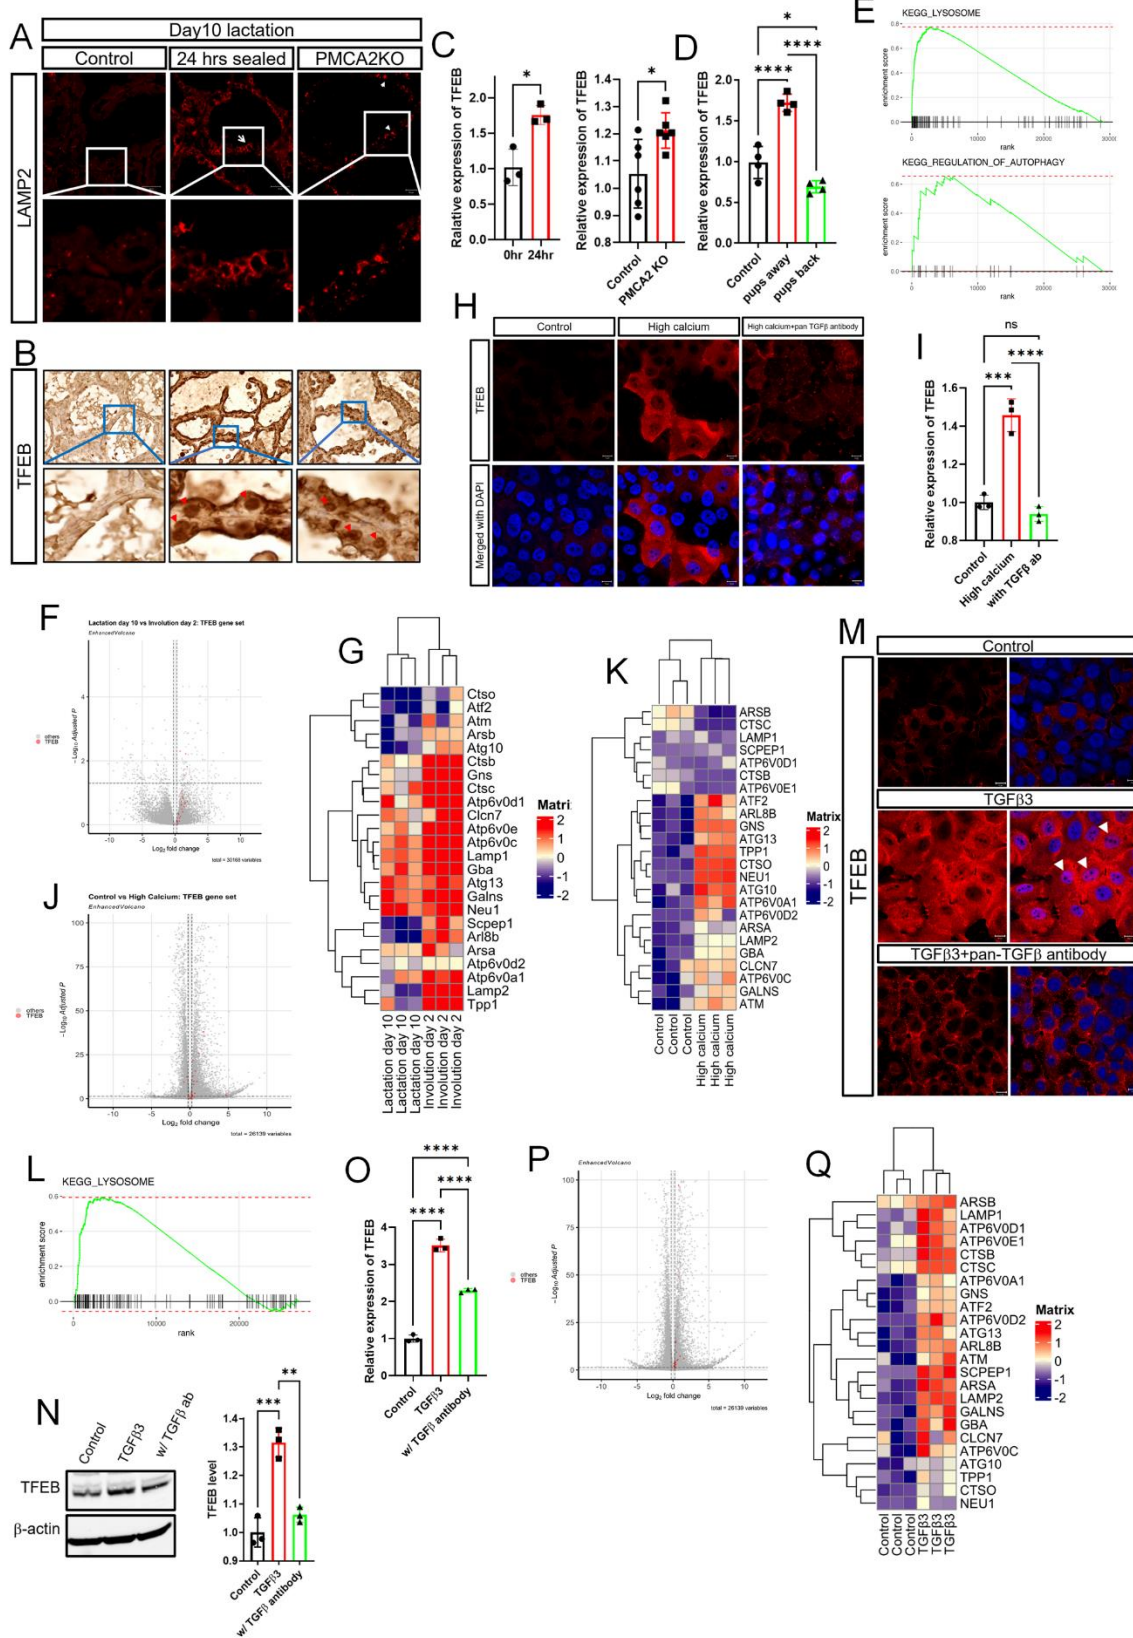

## Figure\_6

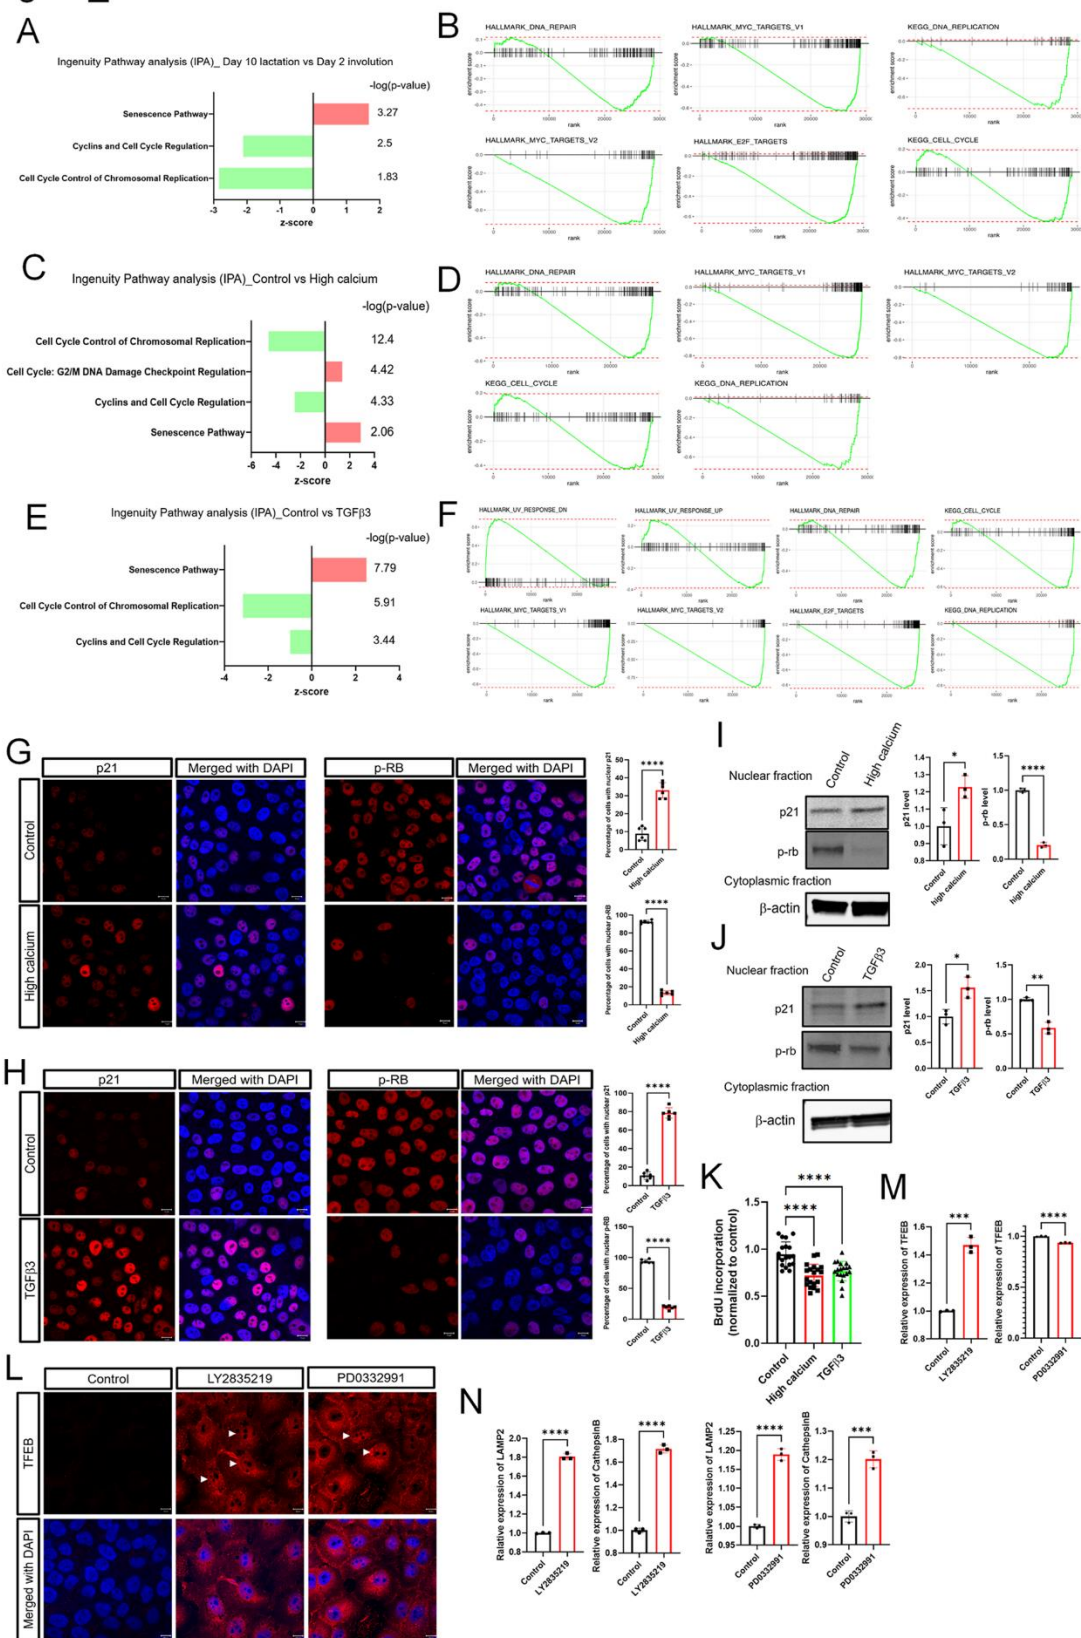



**Supplemental Video 1. Increase of intracellular calcium in 24 hours post teat-sealing gland.** Z-stacks of multiphoton laser scanning microscopic images take from control lactating (left) glands and glands at 24 hours post teat-sealing from BLG-Cre;Ai95 female mice. Blue fluorescence represents the second harmonic-generated signal from the collagen fibers within the fascia covering the glands. Green fluorescence is derived from increased intracellular calcium in MECs expressing the GCaMP6f calcium indicator.

**Supplemental Figure 1. Increased Intracellular Calcium activates STAT3 *in vitro*.**

A) Live cell imaging of MCF10A cells expressing the RCaMP cytoplasmic calcium indicator in response to control media (top) and treatment with 10mM calcium + 1 $\mu$ M ionomycin. n= 20 cells for each of 3 experiments. B) Western analysis of total STAT3 and pSTAT3 from MCF10A cells under control and high calcium (10mM calcium + 1 $\mu$ M ionomycin). (n=3) C) Immunofluorescence for pSTAT3 in MCF10A cells under control or high calcium conditions (10mM calcium + 1 $\mu$ M ionomycin). D) Immunofluorescence for LAMP2 and Cathepsin B in MCF10A cells under control or high calcium conditions (10mM calcium + 1 $\mu$ M ionomycin). Scale bars represents 10 $\mu$ m. E) Lif, IL6, TGF $\beta$ 3, CD14, and LBP mRNA expression in MCF10A cells under control or high calcium conditions (10mM calcium + 1 $\mu$ M ionomycin), as assessed by quantitative RT-PCR (QPCR) (n=3). Bar graphs represent the mean $\pm$ SEM. \*\* denotes p<0.005, \*\*\* denotes p<0.0005, \*\*\*\* denotes p<0.00005.

### **Supplemental Figure 2. TGF $\beta$ 1- mediated SOCS3 degradation through TFEB**

**activation.** A) TGF $\beta$ 1, 2, and 3 mRNA expression in mammary glands in control and 24 hours post teat-sealing, as assessed by quantitative RT-PCR (QPCR) (n=3). B) Western blot analyses of SOCS3 in MCF10A cells exposed to 10ng/ml TGF $\beta$ 1 and 2  $\pm$  2 $\mu$ g/ml pan-TGF $\beta$  antibody. (n=3). C) SOCS3 mRNA expression assessed by QPCR in MCF10A cells exposed to 10ng/ml TGF $\beta$ 1 and 2  $\pm$  2 $\mu$ g/ml pan-TGF $\beta$  antibody. (n=3). D) SOCS3 mRNA expression assessed by QPCR in MCF10A cells exposed to 10ng/ml TGF $\beta$ 1 and 2  $\pm$  10 $\mu$ M/ml of Galiella lactone (n=3). (n=3). Bar graphs represent the mean $\pm$ SEM. \*\* denotes p<0.005, \*\*\* denotes p<0.0005, \*\*\*\* denotes p<0.00005.

### **Supplemental Figure 3. TGF $\beta$ 3 dependent TFEB activation is not associated with calcineurin and mTOR signaling.**

A) Immunofluorescence for NFAT in MCF10A cells exposed to high calcium conditions (10mM calcium + 1 $\mu$ M ionomycin) and 10ng/ml TGF $\beta$ 3. Scale bars represents 10 $\mu$ m. B) Live cell Imaging of GCaMP3-TRPML and RCaMP in MCF10A cells grown at control (top) or high calcium (bottom) conditions. Red fluorescence is triggered by cytoplasmic calcium levels. Green fluorescence is triggered by calcium transport out of lysosomes through the TRPML1 calcium pump. C) LAMP2 and Cathepsin B mRNA expression assessed by QPCR in MCF10A cells exposed to 10ng/ml TGF $\beta$ 3  $\pm$  1 $\mu$ M/ml Cyclosporin A. (n=3). D) Western blot analysis of pS6 (Ser235/236), S6, pS6K1, S6K1, pULK1 (Ser757), ULK1, mTOR in MCF10A cells exposed to high calcium conditions (10mM calcium + 1 $\mu$ M ionomycin) and 10ng/ml TGF $\beta$ 3. Bar graphs represent the mean $\pm$ SEM. \*\*\* denotes p<0.0005.

**Supplemental Figure 4. Inhibition of cell cycle progression reduced SOCS3**

**protein.** A) Western blot analysis of SOCS3 in MCF10A cells exposed to 2.5 $\mu$ M LY2835219 and 5 $\mu$ M PD0332991  $\pm$  2 $\mu$ g/ml pan-TGF $\beta$  antibody. (n=3). B) SOCS3 mRNA expression assessed by QPCR in MCF10A cells exposed to 2.5 $\mu$ M LY2835219 and 5 $\mu$ M PD0332991  $\pm$  2 $\mu$ g/ml pan-TGF $\beta$  antibody. (n=3). C) Working model illustrating how milk stasis initiates LDCD by decreasing PMCA2 levels and increasing intracellular Ca<sup>2+</sup>. Bar graphs represent the mean $\pm$ SEM. \* denotes p<0.05, \*\* denotes p<0.005, \*\*\*\* denotes p<0.00005.

## Supplemental Figure\_1

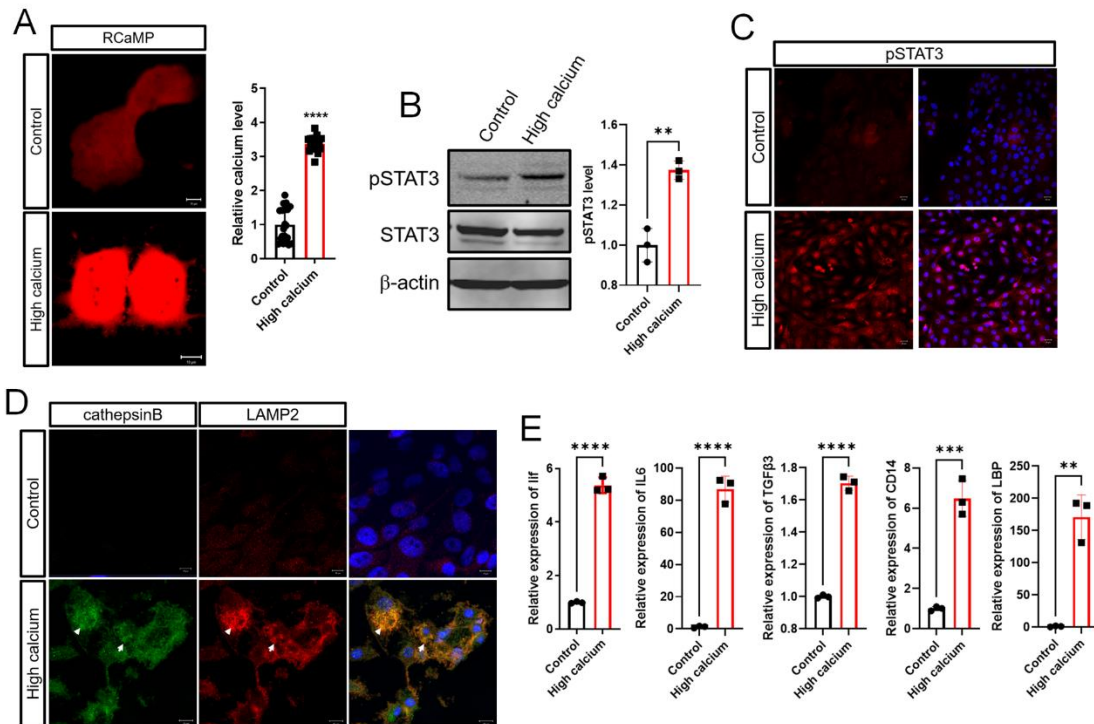

## Supplemental Figure\_2

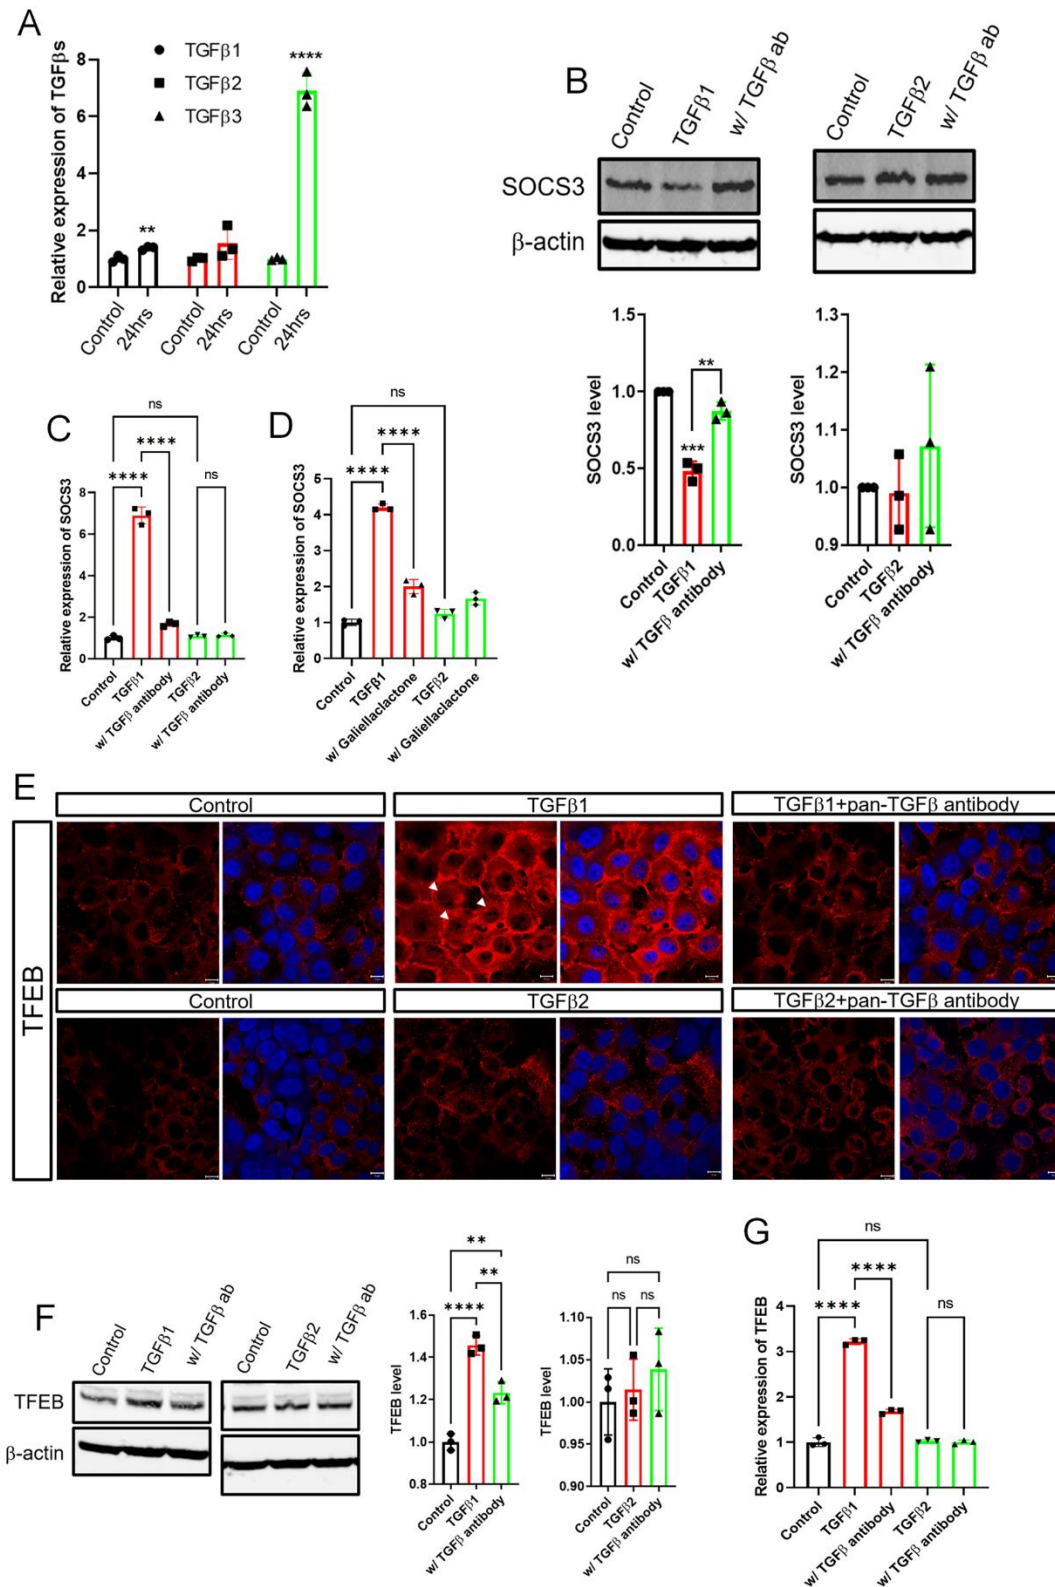

## Supplemental Figure\_3

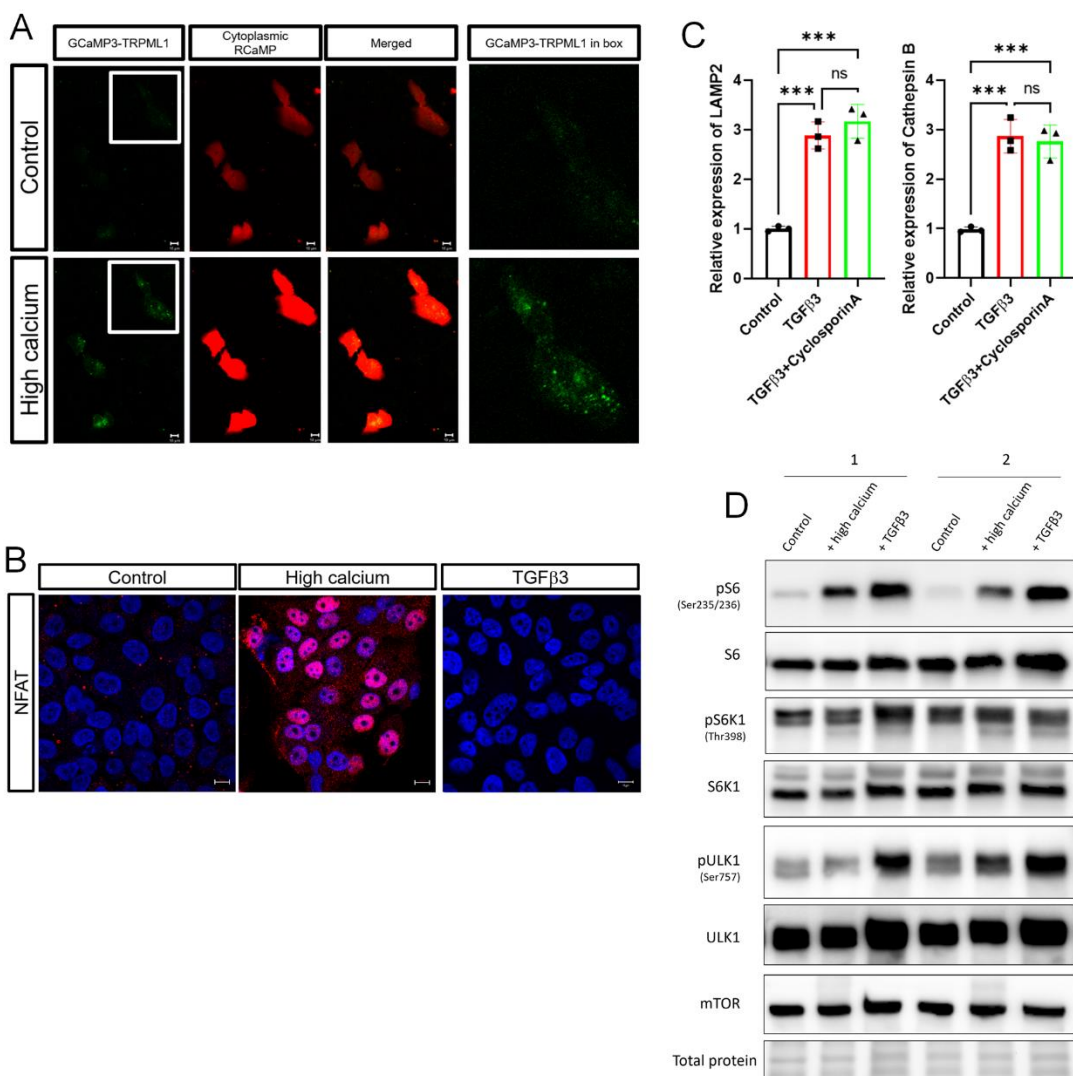

## Supplemental Figure\_4

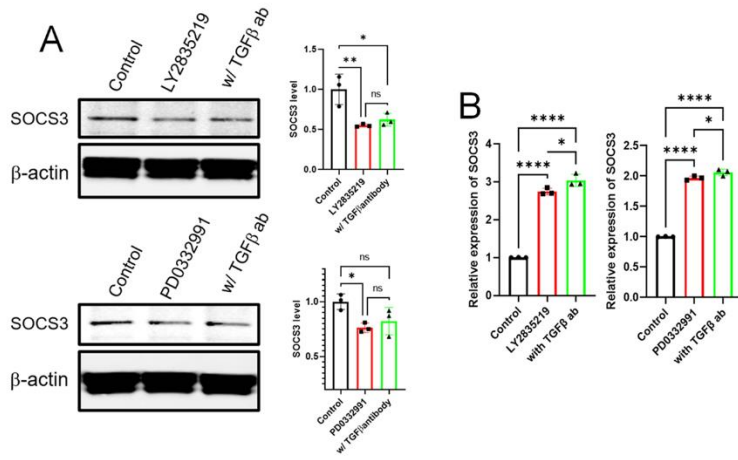

## C Milk stasis/Cell deformation

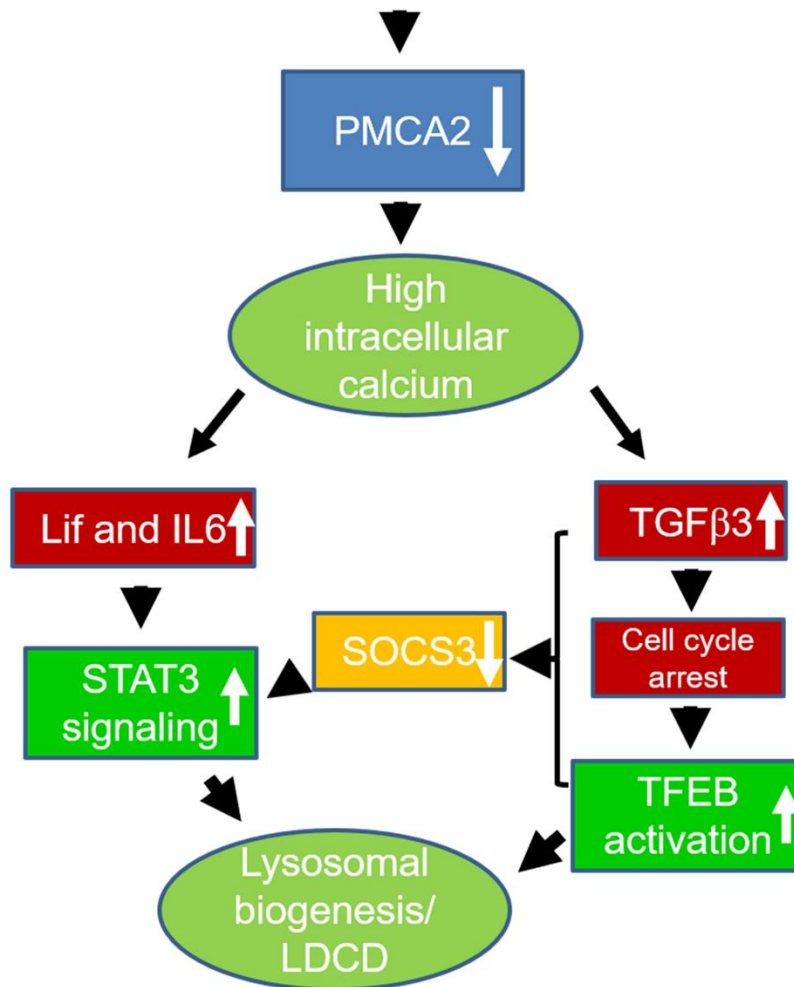

Source: http://biorxiv.org/content/10.1101/2022.05.17.492309v1.full.pdf
